# Supplementary material
Source: PubMed Central journal article supplement (PMC2048709)
Supplement: plntcell_tpc.107.052209_1.pdf [file plntcell_tpc.107.052209_1.pdf]

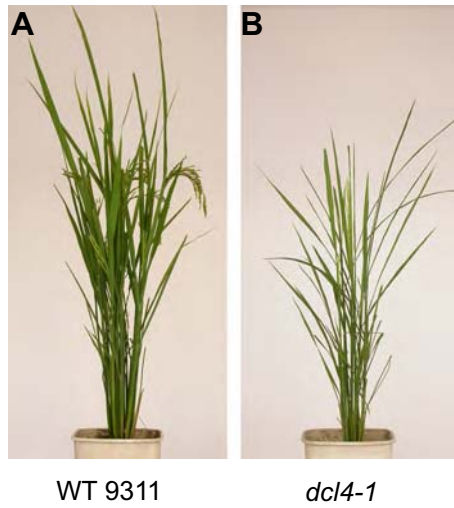

**Supplemental Figure 1: Mature Plants.**

(A) Wild-type plants.

(B) *dcl4-1* plants with semi-dwarf phenotype.

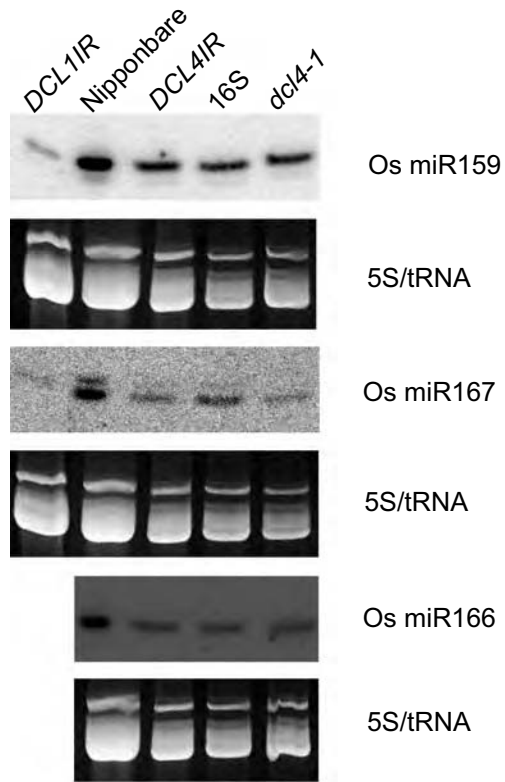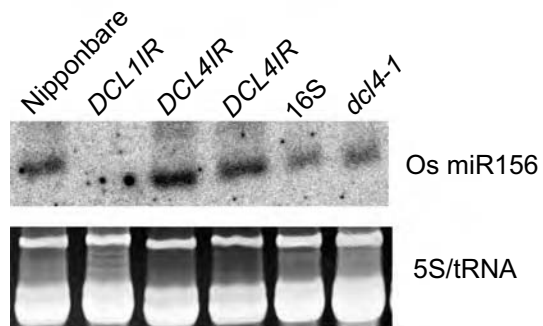

**Supplemental Figure 2**  
**Accumulation of Os miRNAs as Revealed by RNA-Filter Hybridization with End Labeled Oligo DNA Probes.**  
 Nipponbare was used as control of *DCL1IR* and *DCL4IR* transformants; L16S was the wild-type control of *dcl4-1*. The RNAs were extracted from the flower tissues. 5S/tRNA stained with EB were used as loading control.

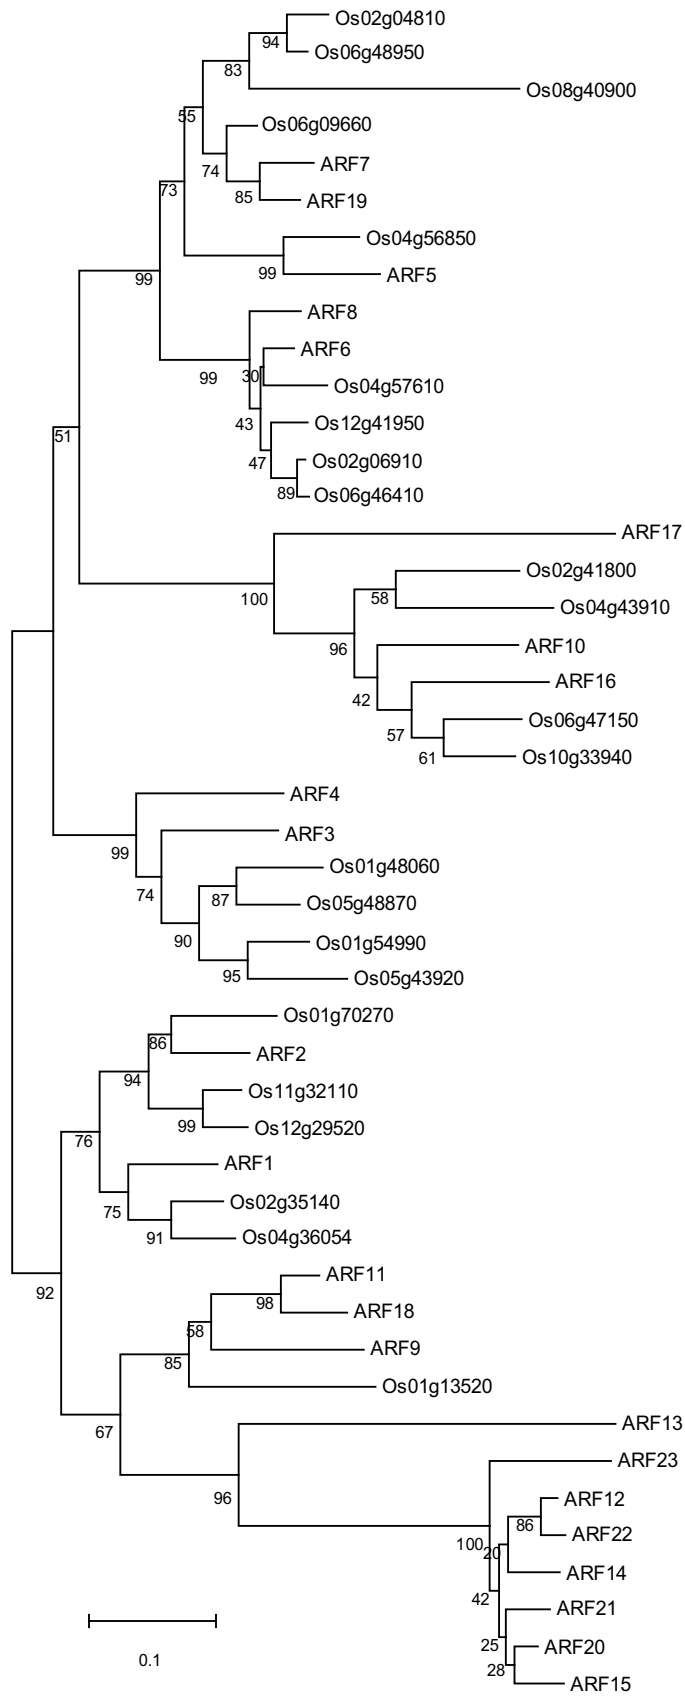

**Supplemental Figure 3. Neighbor-Joining Phylogenetic Tree of Protein Sequences with Bootstrap Values (from 1000 replicates).**



```

Os02g06910 : ---*---20---*---40---*---60---*---80---*---100---*---: 33
Os06g46410 : ---RLSPSAGGVSDQPPSP---PEVAEEQKCNSEIWH : 33
Os12g41950 : ---RLSSSSGSLPAQAAS---PEVAEEQKCNSEIWH : 31
ARF6 : ---RLSPFAS--ADMPQAL---PENDGEQRCNSEIWH : 26
Os04g57610 : ---RLS-----SAGFNP---QFHGEGKRVNSEIWH : 32
ARF8 : ---SSSASISGPPQPPFPAPPE---EGGWLEKKNSEIWH : 25
Os02g04810 : ---MASMKQQQ---TPASSAVTAAASSSATAAVA--ACEGER---KAAANSEIWH : 47
Os06g48950 : ---MMKQAQQQPPPPASSAATTTA---AAAAAAAVVSGCEGEKT---KAPAINSEIWH : 53
Os08g40900 : ---RKDADAQIP---SYPI---SYPI : 13
ARF7 : ---KAPSSNGVSNPVEGER---RNINSEIWH : 27
ARF19 : ---KAPS--NGFLPSSNEGEK---KPINSEIWH : 26
Os06g09660 : ---KDGQSSGVSPAPGEKEK---KAINSEIWH : 27
Os04g56850 : ---MASS--QEAKATGVLRN---AAALLDEMQLMGET---QGAKK--VINSEIWH : 42
ARF5 : ---MMASLSCVEDKMKTSCLVNGGGTTTTTTSQTLLLEMKLLKQD---SGTRKVINSEIWH : 57
Os01g48060 : ---MVG--DLNLTVEEEDDEEGGATGTVT---APAEARAGGAVCLEIWH : 42
Os05g48870 : ---MTG--DLNLTVEEEDDEEAEEVAANGS---SPAPARAG--AVCLEIWH : 41
Os01g54990 : MASSASSSSSPSRPPLMALPSFYRFPWFSERGGEQRATDCWAGSPAAGGRARATAMG--DLNLTASGGEED---APAPGFVCRDIWH : 85
Os05g43920 : ---MG--DLNLTVEEAEEG---AAAA--CCBIWH : 26
ARF3 : ---MGGL--DLNVMETEEDETTQTTPSSASGVSPTSSSSASVSVSSNSAGGG--CCBIWH : 57
ARF4 : ---DKGLGIGSPSSSSCSGSSS---SSSSTGSSASSYSEIWH : 68
ARF11 : ---ANVEAD--FRTSGSN---DEEYTHRK : 24
ARF18 : ---ASVEGDDDFGSSSSRY---QQQYTHRK : 28
Os01g13520 : ---SSQAG--GGVG---DPEFTHRK : 21
ARF9 : ---ANRGE---YTHRK : 15
Os01g70270 : ---PPAAMAPPPPPQGSSTG---DPYTHRK : 27
ARF2 : ---MASSEVMKNGRGDNFSSSGSDPKETRNVSVAGEGQKSNSTRSAA---AERALDPEAAYTHRK : 64
Os11g32110 : ---ATAEVGG---GGGGGGGG---EDALFTHRK : 27
Os12g29520 : ---AAAAATAASVVEGLTGGGGGGGG---VDGFVTHRK : 35
Os02g35140 : ---AGSVVAAAAAGGTGSS---CDALYTHRK : 29
Os04g36054 : ---AAMEMAANPGSGTCS---DALYTHRK : 27
ARF1 : ---AASNHSSGKPGG--VLS---DALYTHRK : 25
ARF12 : ---ESGNVNAQPELSGIDGSK---SYYEIWH : 30
ARF22 : ---ESGNVNAQPELSGIDGSK---SYYEIWH : 30
ARF20 : ---ETGNVNAQPELSGIDGSK---SYYEIWH : 30
ARF21 : ---ESGNVNAQPELSGIDGSK---SYYEIWH : 30
ARF15 : ---ETGNVNAQPELSGIDGSK---SYYEIWH : 30
ARF14 : ---ESGNVNTQPELSGIDGSK---SYYEIWH : 30
ARF23 : ---ESGNVNVQSELSGIDGSK---SYYEIWH : 30
ARF13 : ---ENNGEMNAQPELS--VDITK---TYYEIWH : 28
Os02g41800 : ---MITFADLAEAPG--AERCVDV---OHWL : 24
Os04g43910 : ---ELAGTPEGDGGGVS---OHWL : 21
Os06g47150 : ---MITFVDSAAKERERESDKLDP---OHWL : 26
Os10g33940 : ---MKEVGEVEVRLDP---OHWL : 19
ARF10 : ---MEQEKSLDP---OHWL : 13
ARF16 : ---MNVNMPKGGTEKGLDP---OHWL : 22
ARF17 : ---MSPPSATAGDINHREVDP---OHWL : 22

```

```

Os02g06910 : ACAGLWSEAVGSRVWVFPQHSQVAAS-----T : 64
Os06g46410 : ACAGLWSEAVGSRVWVFPQHSQVAAS-----T : 64
Os12g41950 : ACAGLWSEAVVRSVWVFPQHSQVAAS-----T : 62
ARF6 : ACAGLWSEAVVRSVWVFPQHSQVAAS-----T : 57
Os04g57610 : ACAGLWSEAVVRSVWVFPQHSQVAAS-----T : 69
ARF8 : ACAGLWSEAVVRSVWVFPQHSQVAAT-----T : 56
Os02g04810 : ACAGLWSEAVVRSVWVFPQHSQVALLITVLVHYQSGWEHWAYWLPFSVALLVWSIDSLGRTPAIIRAFLFRKMKRYKSNILRNAFSMLLETAEYLLNLSFLFQVAASM : 161
Os06g48950 : ACAGLWSEAVVRSVWVFPQHSQV----- : 79
Os08g40900 : NLPSKILCRLHSVTML----- : 29
ARF7 : ACAGLWSEAVVRSVWVFPQHSQVAAS----- : 57
ARF19 : ACAGLWSEAVVRSVWVFPQHSQVAAS----- : 56
Os06g09660 : ACAGLWSEAVVRSVWVFPQHSQVAAS----- : 57
Os04g56850 : ACAGLWSEAVVRSVWVFPQHSQVAAS-----T : 73
ARF5 : ACAGLWSEAVVRSVWVFPQHSQVAAS-----T : 88
Os01g48060 : ACAGLWSEAVVRSVWVFPQHSQVAAS-----P : 73
Os05g48870 : ACAGLWSEAVVRSVWVFPQHSQVAAS-----P : 72
Os01g54990 : ACAGLWSEAVVRSVWVFPQHSQVAAS-----G : 116
Os05g43920 : ACAGLWSEAVVRSVWVFPQHSQVAAS-----G : 57
ARF3 : ACAGLWSEAVVRSVWVFPQHSQVAAS----- : 86
ARF4 : ACAGLWSEAVVRSVWVFPQHSQVAAS-----S : 99
ARF11 : ACAGLWSEAVVRSVWVFPQHSQVAAS-----T : 55
ARF18 : ACAGLWSEAVVRSVWVFPQHSQVAAS-----T : 59
Os01g13520 : ACAGLWSEAVVRSVWVFPQHSQVAAS-----T : 52
ARF9 : ACAGLWSEAVVRSVWVFPQHSQVAAS-----T : 46
Os01g70270 : ACAGLWSEAVVRSVWVFPQHSQVAAS-----M : 58
ARF2 : ACAGLWSEAVVRSVWVFPQHSQVAAS-----T : 95
Os11g32110 : ACAGLWSEAVVRSVWVFPQHSQVAAS-----T : 58
Os12g29520 : ACAGLWSEAVVRSVWVFPQHSQVAAS-----T : 66
Os02g35140 : ACAGLWSEAVVRSVWVFPQHSQVAAS-----T : 60
Os04g36054 : ACAGLWSEAVVRSVWVFPQHSQVAAS-----M : 56
ARF1 : ACAGLWSEAVVRSVWVFPQHSQVAAS-----M : 56
ARF12 : LCAGLWSEAVVRSVWVFPQHSQVAAS-----T : 61
ARF22 : LCAGLWSEAVVRSVWVFPQHSQVAAS-----T : 61
ARF20 : LCAGLWSEAVVRSVWVFPQHSQVAAS-----T : 61
ARF21 : LCAGLWSEAVVRSVWVFPQHSQVAAS-----T : 61
ARF15 : LCAGLWSEAVVRSVWVFPQHSQVAAS-----T : 61
ARF14 : LCAGLWSEAVVRSVWVFPQHSQVAAS-----T : 61
ARF23 : LCAGLWSEAVVRSVWVFPQHSQVAAS-----T : 61
ARF13 : LCAGLWSEAVVRSVWVFPQHSQVAAS-----T : 59
Os02g41800 : ACAGLWSEAVVRSVWVFPQHSQVAAS----- : 57
Os04g43910 : ACAGLWSEAVVRSVWVFPQHSQVAAS----- : 52
Os06g47150 : ACAGLWSEAVVRSVWVFPQHSQVAAS----- : 57
Os10g33940 : ACAGLWSEAVVRSVWVFPQHSQVAAS----- : 53
ARF10 : ACAGLWSEAVVRSVWVFPQHSQVAAS----- : 44
ARF16 : ACAGLWSEAVVRSVWVFPQHSQVAAS----- : 53
ARF17 : ACAGLWSEAVVRSVWVFPQHSQVAAS----- : 54

```

```

Os02g06910 : * 240 * 260 * 280 * 300 * 320 * 340
Os06g46410 : NKEMESQIPNYPNPDIQCHNTHMDARTEDEYQCMLOLSPEQL-----KDFLPAELGTA--SQPTNYGRLTSDPSTHGFSVVRRAAEKVFIFLL- : 164
Os12g41950 : NKEVDAQIPNYPNPDIQCHNTHMDARTEDEYQCMLOLSPEEQ-----KEFLPMLGAA--SQPTNYGRLTSDPSTHGFSVVRRAAEKVFIFLL- : 162
ARF6 : NKEVDARIPNYPNPDIQCHNTHMDARTEDEYQCMLOLSNAQEQ-----KDFLPAELGVP--SQPTNYGRLTSDPSTHGFSVVRRAAEKVFIFLL- : 157
Os04g57610 : NKEVEGHIPNYPNPDIQCHNTHMDARTEDEYQCMLOLSNPFQ-----NDAYLPAELGIM--SQPTNYGRLTSDPSTHGFSVVRRAAEKVFIFLL- : 168
ARF8 : NKEVDGHIPNYPNPDIQCHNTHMDARTEDEYQCMLOLSLPEEQ-----KETFVPLTEGIP--SQPSNYGRLTSDPSTHGFSVVRRAAEKVFIFLL- : 156
Os02g04810 : QKVDVHIVSPYPNPDIQCHNTHMDARTEDEYQCMLOVNTY-G-----KEALQISELALKQ--APQMEPFGRLTSDPSTHGFSVVRRAAEKVFIFLL- : 261
Os06g48950 : -----DPTEDEYQCMLOVNSC-D-----KDALQISELALKQ--APQTEPFGRLTSDPSTHGFSVVRRAAEKVFIFLL- : 151
Os08g40900 : -----DPTEDEYQCMLOVNSC-D-----KTELASELALKQ--TPQTEPFGRLTSDPSTHGFSVVRRAAEKVFIFLL- : 101
ARF7 : MQKQTDIPIPNYPNPDIQCHNTHMDARTEDEYQCMLOVNSC-D-----RDALLASDMGLK--NQFNDFGRLTSDPSTHGFSVVRRAAEKVFIFLL- : 157
ARF19 : MQKQTDIPIPNYPNPDIQCHNTHMDARTEDEYQCMLOVNSC-D-----REALLASDMGLK--NQFTEPFGRLTSDPSTHGFSVVRRAAEKVFIFLL- : 156
Os06g09660 : MKKELDNIPIPNYPNPDIQCHNTHMDARTEDEYQCMLOVNSC-D-----RDAMLASELGLK--NQQPAEFGRLTSDPSTHGFSVVRRAAEKVFIFLL- : 157
Os04g56850 : RKIPNSRIPNYPNPDIQCHNTHMDARTEDEYQCMLOVNSC-D-----TDVFPITLGLAYTKS--HPTEVFGRLTSDPSTHGFSVVRRAAEKVFIFLL- : 173
ARF5 : RRSATTQVNYPNPDIQCHNTHMDARTEDEYQCMLOVNSC-D-----RDVFPVDFGLRGS--HPTEVFGRLTSDPSTHGFSVVRRAAEKVFIFLL- : 188
Os01g48060 : GS-GFG-----AAVPHFRVVDVTLDAATADEYQCMLOVNEEVER--RMREGEDGACDGEDGAVKRPARIPIHFGRLTSDPSTHGFSVVRRAAEKVFIFLL- : 176
Os05g48870 : AA-AAAA-----AAVPHFRVVDVTLDAATADEYQCMLOVNEEVER--RADGGE-----GDDGGMQRFAARMPHFGRLTSDPSTHGFSVVRRAAEKVFIFLL- : 171
Os01g54990 : GIRGEGA-----AAVPHFRVVDVTLDAATADEYQCMLOVNEEVER--NLH-GGGIEREDMDGDEERKSRMLHFGRLTSDPSTHGFSVVRRAAEKVFIFLL- : 220
Os05g43920 : EYVPGA-----AAVPHFRVVDVTLDAATADEYQCMLOVNEEVER--NFREGGEDGAGEMEGCDAEKKFRPMHFGRLTSDPSTHGFSVVRRAAEKVFIFLL- : 164
ARF3 : --FSAAI-----YCPHFRVVDVTLDAATADEYQCMLOVNEEVER--KVEDIER-----KVREGIIVDVG--GGEDEYELKRSNTPHFGRLTSDPSTHGFSVVRRAAEKVFIFLL- : 188
ARF4 : YSSPLEI--PKFTNPOVSRVWVCLLAKDTEDEYQCMLOLQESML--NGGEGVKELGGEEERSSSRTPHFGRLTSDPSTHGFSVVRRAAEKVFIFLL- : 206
ARF11 : NQCVVDQEIFVFNPKLRLSLTLRHEHTEDEYQCMLOLQEQDQ-S-----EPTSDDPVLVEFAPPTVDVDFGRLTSDPSTHGFSVVRRAAEKVFIFLL- : 154
ARF18 : NQGINSEIIVFDFPKLRLSLTLRHEHTEDEYQCMLOLQEQDQ-S-----EPTSDDPVLVEFAPPTVDVDFGRLTSDPSTHGFSVVRRAAEKVFIFLL- : 158
Os01g13520 : DQALLAEQIKMFQYKILKLVNMLKQETEDFYQCMLOLQEQDQ-----LPTLPDPPLEPQPVVHSGRLTSDPSTHGFSVVRRAAEKVFIFLL- : 152
ARF9 : QQVDLNTMKPLVDFPKLRLSLTLRHEHTEDEYQCMLOLQEQDQ-----EPMSPDPSPEQLPKVHSGRLTSDPSTHGFSVVRRAAEKVFIFLL- : 146
Os01g70270 : NQVADQIIPNYPNPDIQCHNTHMDARTEDEYQCMLOLQEQDQ-----MAVEKTPPTSQPVAQPPVRSRGRGRLTSDPSTHGFSVVRRAAEKVFIFLL- : 159
ARF2 : NQAEAEQ--MPLYDMSKLRVNLVDRKQADTEDEYQCMLOLQEQDQ-----NAIEKAPLPPP--PFOVHSGRLTSDPSTHGFSVVRRAAEKVFIFLL- : 194
Os11g32110 : NQVGEQR--MPLYDMSKLRVNLVDRKQADTEDEYQCMLOLQEQDQ-----TEEVPSAPAAGHVPRVHSGRLTSDPSTHGFSVVRRAAEKVFIFLL- : 162
Os12g29520 : NQVAEQGGAPLYNDFPKLRLSLTLRHEHTEDEYQCMLOLQEQDQ-----LTSKPPEPHEPKCNVHSGRLTSDPSTHGFSVVRRAAEKVFIFLL- : 178
Os02g35140 : DQQLDQ--LPLFNDMSKLRVNLVDRKQADTEDEYQCMLOLQEQDQ-----LTSKPPEPHEPKCNVHSGRLTSDPSTHGFSVVRRAAEKVFIFLL- : 158
Os04g36054 : NQQLDQ--LPLFNDMSKLRVNLVDRKQADTEDEYQCMLOLQEQDQ-----LTSKPPEPHEPKCNVHSGRLTSDPSTHGFSVVRRAAEKVFIFLL- : 156
ARF1 : HQGLEQ--MFSFNDMSKLRVNLVDRKQADTEDEYQCMLOLQEQDQ-----PTSADPVOEPEKCTVHSGRLTSDPSTHGFSVVRRAAEKVFIFLL- : 154
ARF12 : REELNEL--OPTCDMSKLRVNLVDRKQADTEDEYQCMLOLQEQDQ-----QVVIPTQENQFPLVNSGRLTSDPSTHGFSVVRRAAEKVFIFLL- : 156
ARF22 : REELNEL--KPICDMSKLRVNLVDRKQADTEDEYQCMLOLQEQDQ-----QVVIPTQENQFPLVNSGRLTSDPSTHGFSVVRRAAEKVFIFLL- : 154
ARF20 : REELNEL--OPTCDMSKLRVNLVDRKQADTEDEYQCMLOLQEQDQ-----QVVIPTQENQFPLVNSGRLTSDPSTHGFSVVRRAAEKVFIFLL- : 155
ARF21 : REELNEL--OPTCDMSKLRVNLVDRKQADTEDEYQCMLOLQEQDQ-----QVVIPTQENQFPLVNSGRLTSDPSTHGFSVVRRAAEKVFIFLL- : 156
ARF15 : REELNEL--OPTCDMSKLRVNLVDRKQADTEDEYQCMLOLQEQDQ-----NLQVVIPTQENQFPLVNSGRLTSDPSTHGFSVVRRAAEKVFIFLL- : 161
ARF14 : REELNEL--OPTCDMSKLRVNLVDRKQADTEDEYQCMLOLQEQDQ-----QVVIPTQENQFPLVNSGRLTSDPSTHGFSVVRRAAEKVFIFLL- : 156
ARF23 : REELNEL--QPCDFMSKLRVNLVDRKQADTEDEYQCMLOLQEQDQ-----QVVIPTQENQFPLVNSGRLTSDPSTHGFSVVRRAAEKVFIFLL- : 156
ARF13 : RDELDDI--RFIFDMSKLRVNLVDRKQADTEDEYQCMLOLQEQDQ-----EVMTHNTMDTRPIVIVFSGRLTSDPSTHGFSVVRRAAEKVFIFLL- : 154
Os02g41800 : -----ELSAARVAVRVAWRYMDPDTDEYQCMLOLQEQDQ-----DVEDGAAAG--EHEEP--ASARVAVRVAWRYMDPDTDEYQCMLOLQEQDQ----- : 150
Os04g43910 : -----DLSARVAVRVAWRYMDPDTDEYQCMLOLQEQDQ-----DVGEAAAARREENS--PRPTSGRLTSDPSTHGFSVVRRAAEKVFIFLL- : 151
Os06g47150 : -----PVEFPGGVAVLVRVAGRFMDPDTDEYQCMLOLQEQDQ-----G-DADDGIGAAAAAAQ--EKPASARVAVRVAWRYMDPDTDEYQCMLOLQEQDQ----- : 158
Os10g33940 : -----AAAALGEPRAEPLVLRVAGVQFLDRDSEYQCMLOLQEQDQ-----EPDELCLGAAADAAEPPSEKPTSGRLTSDPSTHGFSVVRRAAEKVFIFLL- : 158
ARF10 : DFHAPVPLILRQVSKFLDADTEDEYQCMLOLQEQDQ-----NDAVLGLTSPSSDNGNGEKFPASARVAVRVAWRYMDPDTDEYQCMLOLQEQDQ----- : 154
ARF16 : DFGNLSPEMFLRVAWRYMDPDTDEYQCMLOLQEQDQ-----VVDHEYGDGSDNGFSNSKPTSGRLTSDPSTHGFSVVRRAAEKVFIFLL- : 150
ARF17 : -----LPTSSST--PPTTS--OLLADPVDYVNEFHLT--QMTQQOFT--PTNYSRFRGDDVDDNNKVT--GRLTSDPSTHGFSVVRRAAEKVFIFLL- : 149

```

```

p c a 3DE 5a 6 L p F K L tAsDts Ggfs6 A p L
Os02g06910 : * 360 * 380 * 400 * 420 *
Os06g46410 : -----FQQPBAQLARDLIDGNMRFHHFRQCKRHLLTTC--WVFSAKRLAGEVLFVWVNDNSNOLLGIRRANRPQIVMPSSV----- : 246
Os12g41950 : -----FQQPBAQLARDLIDGNMRFHHFRQCKRHLLTTC--WVFSAKRLAGEVLFVWVNDNSNOLLGIRRANRPQIVMPSSV----- : 244
ARF6 : -----YQQPBAQLARDLIDGNMRFHHFRQCKRHLLTTC--WVFSAKRLAGEVLFVWVNDNSNOLLGIRRANRPQIVMPSSV----- : 239
Os04g57610 : -----FQQPBAQLARDLIDGNMRFHHFRQCKRHLLTTC--WVFSAKRLAGEVLFVWVNDNSNOLLGIRRANRPQIVMPSSV----- : 250
ARF8 : -----YQQPBAQLARDLIDGNMRFHHFRQCKRHLLTTC--WVFSAKRLAGEVLFVWVNDNSNOLLGIRRANRPQIVMPSSV----- : 238
Os02g04810 : -----FMQPBAQLARDLIDGNMRFHHFRQCKRHLLTTC--WVFSAKRLAGEVLFVWVNDNSNOLLGIRRANRPQIVMPSSV----- : 319
Os06g48950 : -----FMQPBAQLARDLIDGNMRFHHFRQCKRHLLTTC--WVFSAKRLAGEVLFVWVNDNSNOLLGIRRANRPQIVMPSSV----- : 233
Os08g40900 : -----FMQPBAQLARDLIDGNMRFHHFRQCKRHLLTTC--WVFSAKRLAGEVLFVWVNDNSNOLLGIRRANRPQIVMPSSV----- : 183
ARF9 : -----FMQPBAQLARDLIDGNMRFHHFRQCKRHLLTTC--WVFSAKRLAGEVLFVWVNDNSNOLLGIRRANRPQIVMPSSV----- : 239
Os06g09660 : -----FMQPBAQLARDLIDGNMRFHHFRQCKRHLLTTC--WVFSAKRLAGEVLFVWVNDNSNOLLGIRRANRPQIVMPSSV----- : 239
Os04g56850 : -----YMQPBAQLARDLIDGNMRFHHFRQCKRHLLTTC--WVFSAKRLAGEVLFVWVNDNSNOLLGIRRANRPQIVMPSSV----- : 255
ARF5 : -----YMQPBAQLARDLIDGNMRFHHFRQCKRHLLTTC--WVFSAKRLAGEVLFVWVNDNSNOLLGIRRANRPQIVMPSSV----- : 270
Os01g48060 : -----DYLOPBAQLARDLIDGNMRFHHFRQCKRHLLTTC--WVFSAKRLAGEVLFVWVNDNSNOLLGIRRANRPQIVMPSSV----- : 259
Os05g48870 : -----DYLOPBAQLARDLIDGNMRFHHFRQCKRHLLTTC--WVFSAKRLAGEVLFVWVNDNSNOLLGIRRANRPQIVMPSSV----- : 254
Os01g54990 : -----DHKQBAQLARDLIDGNMRFHHFRQCKRHLLTTC--WVFSAKRLAGEVLFVWVNDNSNOLLGIRRANRPQIVMPSSV----- : 303
Os05g43920 : HLKELKLTVDNYTVRPSQLRDLVGLTQVRFHHFRQCKRHLLTTC--WVFSAKRLAGEVLFVWVNDNSNOLLGIRRANRPQIVMPSSV----- : 257
ARF3 : -----DYQOPBAQLARDLIDGNMRFHHFRQCKRHLLTTC--WVFSAKRLAGEVLFVWVNDNSNOLLGIRRANRPQIVMPSSV----- : 271
ARF4 : -----DYQOPBAQLARDLIDGNMRFHHFRQCKRHLLTTC--WVFSAKRLAGEVLFVWVNDNSNOLLGIRRANRPQIVMPSSV----- : 288
ARF11 : -----MQPPTBAQLARDLIDGNMRFHHFRQCKRHLLTTC--WVFSAKRLAGEVLFVWVNDNSNOLLGIRRANRPQIVMPSSV----- : 236
ARF18 : -----MQPPTBAQLARDLIDGNMRFHHFRQCKRHLLTTC--WVFSAKRLAGEVLFVWVNDNSNOLLGIRRANRPQIVMPSSV----- : 240
Os01g13520 : -----MMATPBAQLARDLIDGNMRFHHFRQCKRHLLTTC--WVFSAKRLAGEVLFVWVNDNSNOLLGIRRANRPQIVMPSSV----- : 234
ARF9 : -----MQPPTBAQLARDLIDGNMRFHHFRQCKRHLLTTC--WVFSAKRLAGEVLFVWVNDNSNOLLGIRRANRPQIVMPSSV----- : 228
Os01g70270 : -----MQPPTBAQLARDLIDGNMRFHHFRQCKRHLLTTC--WVFSAKRLAGEVLFVWVNDNSNOLLGIRRANRPQIVMPSSV----- : 241
ARF2 : -----MQPPTBAQLARDLIDGNMRFHHFRQCKRHLLTTC--WVFSAKRLAGEVLFVWVNDNSNOLLGIRRANRPQIVMPSSV----- : 276
Os11g32110 : -----MQPPTBAQLARDLIDGNMRFHHFRQCKRHLLTTC--WVFSAKRLAGEVLFVWVNDNSNOLLGIRRANRPQIVMPSSV----- : 244
Os12g29520 : -----MQPPTBAQLARDLIDGNMRFHHFRQCKRHLLTTC--WVFSAKRLAGEVLFVWVNDNSNOLLGIRRANRPQIVMPSSV----- : 260
Os02g35140 : -----MQPPTBAQLARDLIDGNMRFHHFRQCKRHLLTTC--WVFSAKRLAGEVLFVWVNDNSNOLLGIRRANRPQIVMPSSV----- : 240
Os04g36054 : -----MQPPTBAQLARDLIDGNMRFHHFRQCKRHLLTTC--WVFSAKRLAGEVLFVWVNDNSNOLLGIRRANRPQIVMPSSV----- : 238
ARF1 : -----MQPPTBAQLARDLIDGNMRFHHFRQCKRHLLTTC--WVFSAKRLAGEVLFVWVNDNSNOLLGIRRANRPQIVMPSSV----- : 236
ARF12 : -----MQPPTBAQLARDLIDGNMRFHHFRQCKRHLLTTC--WVFSAKRLAGEVLFVWVNDNSNOLLGIRRANRPQIVMPSSV----- : 232
ARF22 : -----MQPPTBAQLARDLIDGNMRFHHFRQCKRHLLTTC--WVFSAKRLAGEVLFVWVNDNSNOLLGIRRANRPQIVMPSSV----- : 236
ARF20 : -----PLAQAQLARDLIDGNMRFHHFRQCKRHLLTTC--WVFSAKRLAGEVLFVWVNDNSNOLLGIRRANRPQIVMPSSV----- : 234
ARF21 : -----MQPPTBAQLARDLIDGNMRFHHFRQCKRHLLTTC--WVFSAKRLAGEVLFVWVNDNSNOLLGIRRANRPQIVMPSSV----- : 238
ARF15 : -----MQPPTBAQLARDLIDGNMRFHHFRQCKRHLLTTC--WVFSAKRLAGEVLFVWVNDNSNOLLGIRRANRPQIVMPSSV----- : 243
ARF14 : -----MQPPTBAQLARDLIDGNMRFHHFRQCKRHLLTTC--WVFSAKRLAGEVLFVWVNDNSNOLLGIRRANRPQIVMPSSV----- : 238
ARF23 : -----MQPPTBAQLARDLIDGNMRFHHFRQCKRHLLTTC--WVFSAKRLAGEVLFVWVNDNSNOLLGIRRANRPQIVMPSSV----- : 222
ARF13 : -----MQPPTBAQLARDLIDGNMRFHHFRQCKRHLLTTC--WVFSAKRLAGEVLFVWVNDNSNOLLGIRRANRPQIVMPSSV----- : 238
Os02g41800 : -----YADPBAQLARDLIDGNMRFHHFRQCKRHLLTTC--WVFSAKRLAGEVLFVWVNDNSNOLLGIRRANRPQIVMPSSV----- : 243
Os04g43910 : -----YADPBAQLARDLIDGNMRFHHFRQCKRHLLTTC--WVFSAKRLAGEVLFVWVNDNSNOLLGIRRANRPQIVMPSSV----- : 245
Os06g47150 : -----YADPBAQLARDLIDGNMRFHHFRQCKRHLLTTC--WVFSAKRLAGEVLFVWVNDNSNOLLGIRRANRPQIVMPSSV----- : 259
Os10g33940 : -----YADPBAQLARDLIDGNMRFHHFRQCKRHLLTTC--WVFSAKRLAGEVLFVWVNDNSNOLLGIRRANRPQIVMPSSV----- : 253
ARF10 : -----YADPBAQLARDLIDGNMRFHHFRQCKRHLLTTC--WVFSAKRLAGEVLFVWVNDNSNOLLGIRRANRPQIVMPSSV----- : 234
ARF16 : -----YNAEPBAQLARDLIDGNMRFHHFRQCKRHLLTTC--WVFSAKRLAGEVLFVWVNDNSNOLLGIRRANRPQIVMPSSV----- : 245
ARF17 : -----FOIDPBAQLARDLIDGNMRFHHFRQCKRHLLTTC--WVFSAKRLAGEVLFVWVNDNSNOLLGIRRANRPQIVMPSSV----- : 243

```

```

Os02g06910 : 460 * 480 * 500 * 520 * 540 * 560 *
-----LSSDSHIGLIAAARAAATNSRITVFYNER--ASPSEFVPLAKVKAHYHTRISVGMRFRLMTEESS-VRRMMEITG : 326
Os06g46410 : -----LSSDSHIGLIAAARAAATNSRITVFYNER--ASPSEFVPLSKVKAHYHTRISVGMRFRLMTEESS-VRRMMEITG : 326
Os12g41950 : -----LSSDSHIGLIAAARAAATNSRITVFYNER--ASPSEFVPLAKVKAHYHTRISVGMRFRLMTEESS-VRRMMEITG : 324
ARF6 : -----LSSDSHIGLIAAARAAATNSRITVFYNER--ASPSEFVPLAKVKAHYHTRISVGMRFRLMTEESS-VRRMMEITG : 319
Os04g57160 : -----LSSDSHIGLIAAARAAATNSRITVFYNER--ASPSEFVPLSKVKAHYHTRISVGMRFRLMTEESS-VRRMMEITG : 320
ARF8 : -----LSSDSHIGLIAAARAAATNSRITVFYNER--ASPSEFVPLSKVKAHYHTRISVGMRFRLMTEESS-VRRMMEITG : 318
Os02g04810 : -----LSSDSHIGLIAAARAAATNSRITVFYNER--ASPSEFVPLAKVKAHYHTRISVGMRFRLMTEESS-VRRMMEITG : 368
Os06g48950 : -----LSSDSHIGLIAAARAAATNSRITVFYNER--ASPSEFVPLAKVKAHYHTRISVGMRFRLMTEESS-VRRMMEITG : 313
Os08g40900 : -----LSSDSHIGLIAAARAAATNSRITVFYNER--ASPSEFVPLAKVKAHYHTRISVGMRFRLMTEESS-VRRMMEITG : 263
ARF7 : -----LSSDSHIGLIAAARAAATNSRITVFYNER--ASPSEFVPLAKVKAHYHTRISVGMRFRLMTEESS-VRRMMEITG : 319
ARF19 : -----LSSDSHIGLIAAARAAATNSRITVFYNER--ASPSEFVPLAKVKAHYHTRISVGMRFRLMTEESS-VRRMMEITG : 317
Os06g09660 : -----LSSDSHIGLIAAARAAATNSRITVFYNER--ASPSEFVPLAKVKAHYHTRISVGMRFRLMTEESS-VRRMMEITG : 318
Os04g56850 : -----LSSDSHIGLIAAARAAATNSRITVFYNER--ASPSEFVPLAKVKAHYHTRISVGMRFRLMTEESS-VRRMMEITG : 334
ARF5 : -----LSSDSHIGLIAAARAAATNSRITVFYNER--ASPSEFVPLAKVKAHYHTRISVGMRFRLMTEESS-VRRMMEITG : 350
Os01g48060 : -----LSSDSHIGLIAAARAAATNSRITVFYNER--ASPSEFVPLAKVKAHYHTRISVGMRFRLMTEESS-VRRMMEITG : 342
Os05g48870 : -----LSSDSHIGLIAAARAAATNSRITVFYNER--ASPSEFVPLAKVKAHYHTRISVGMRFRLMTEESS-VRRMMEITG : 333
Os01g54990 : -----LSSDSHIGLIAAARAAATNSRITVFYNER--ASPSEFVPLAKVKAHYHTRISVGMRFRLMTEESS-VRRMMEITG : 381
Os05g43920 : -----LSSDSHIGLIAAARAAATNSRITVFYNER--ASPSEFVPLAKVKAHYHTRISVGMRFRLMTEESS-VRRMMEITG : 335
ARF3 : -----LSSDSHIGLIAAARAAATNSRITVFYNER--ASPSEFVPLAKVKAHYHTRISVGMRFRLMTEESS-VRRMMEITG : 350
ARF4 : -----LSSDSHIGLIAAARAAATNSRITVFYNER--ASPSEFVPLAKVKAHYHTRISVGMRFRLMTEESS-VRRMMEITG : 367
ARF11 : -----LSSDSHIGLIAAARAAATNSRITVFYNER--ASPSEFVPLAKVKAHYHTRISVGMRFRLMTEESS-VRRMMEITG : 313
ARF18 : -----LSSDSHIGLIAAARAAATNSRITVFYNER--ASPSEFVPLAKVKAHYHTRISVGMRFRLMTEESS-VRRMMEITG : 317
Os01g13520 : -----LSSDSHIGLIAAARAAATNSRITVFYNER--ASPSEFVPLAKVKAHYHTRISVGMRFRLMTEESS-VRRMMEITG : 313
ARF9 : -----LSSDSHIGLIAAARAAATNSRITVFYNER--ASPSEFVPLAKVKAHYHTRISVGMRFRLMTEESS-VRRMMEITG : 305
Os01g70270 : -----LSSDSHIGLIAAARAAATNSRITVFYNER--ASPSEFVPLAKVKAHYHTRISVGMRFRLMTEESS-VRRMMEITG : 320
ARF2 : -----LSSDSHIGLIAAARAAATNSRITVFYNER--ASPSEFVPLAKVKAHYHTRISVGMRFRLMTEESS-VRRMMEITG : 355
Os11g32110 : -----LSSDSHIGLIAAARAAATNSRITVFYNER--ASPSEFVPLAKVKAHYHTRISVGMRFRLMTEESS-VRRMMEITG : 323
Os12g29520 : -----LSSDSHIGLIAAARAAATNSRITVFYNER--ASPSEFVPLAKVKAHYHTRISVGMRFRLMTEESS-VRRMMEITG : 339
Os02g35140 : -----LSSDSHIGLIAAARAAATNSRITVFYNER--ASPSEFVPLAKVKAHYHTRISVGMRFRLMTEESS-VRRMMEITG : 319
Os04g36054 : -----LSSDSHIGLIAAARAAATNSRITVFYNER--ASPSEFVPLAKVKAHYHTRISVGMRFRLMTEESS-VRRMMEITG : 317
ARF1 : -----LSSDSHIGLIAAARAAATNSRITVFYNER--ASPSEFVPLAKVKAHYHTRISVGMRFRLMTEESS-VRRMMEITG : 315
ARF12 : -----LSSDSHIGLIAAARAAATNSRITVFYNER--ASPSEFVPLAKVKAHYHTRISVGMRFRLMTEESS-VRRMMEITG : 315
ARF22 : -----LSSDSHIGLIAAARAAATNSRITVFYNER--ASPSEFVPLAKVKAHYHTRISVGMRFRLMTEESS-VRRMMEITG : 313
ARF20 : -----LSSDSHIGLIAAARAAATNSRITVFYNER--ASPSEFVPLAKVKAHYHTRISVGMRFRLMTEESS-VRRMMEITG : 313
ARF21 : -----LSSDSHIGLIAAARAAATNSRITVFYNER--ASPSEFVPLAKVKAHYHTRISVGMRFRLMTEESS-VRRMMEITG : 315
ARF15 : -----LSSDSHIGLIAAARAAATNSRITVFYNER--ASPSEFVPLAKVKAHYHTRISVGMRFRLMTEESS-VRRMMEITG : 320
ARF14 : -----LSSDSHIGLIAAARAAATNSRITVFYNER--ASPSEFVPLAKVKAHYHTRISVGMRFRLMTEESS-VRRMMEITG : 315
ARF23 : -----LSSDSHIGLIAAARAAATNSRITVFYNER--ASPSEFVPLAKVKAHYHTRISVGMRFRLMTEESS-VRRMMEITG : -
ARF13 : -----LSSDSHIGLIAAARAAATNSRITVFYNER--ASPSEFVPLAKVKAHYHTRISVGMRFRLMTEESS-VRRMMEITG : 315
Os02g41800 : GGLMRGNASPC-----AAAK-----SSANQHQGVASVNVNFKTKGCMNVYKPR--SSDFVSYDRLDANN-KFNMGRFRRLGDDDFS-EKRCEFTLIG : 337
Os04g43100 : RGLMRNATAT-----ATGGRT--PPKGGPPENLTAATRATGTPGPEVLYYR--ASTPEFCRAAAVRAA-ARV-QWCPMRFRKMAETDSSRSISWMTVAS : 342
Os06g47150 : SMFLRGDDDN-----KMAAARG-----KVRARARPEEVEANLAVSGGPEVLYYR--ASTPEFCRAAAVRAA-ARV-QWCPMRFRKMAETDSSRSISWMTVAS : 358
Os10g33940 : SAFLK-EEEKS-----LMKGGGGG-YMKGGKGRMADVEASLASSGGPEVLYYR--ASTPEFCRAAAVRAA-ARV-QWCPMRFRKMAETDSSRSISWMTVAS : 354
ARF10 : SGLRDEESTTTTSLKMKRNNNDGAAATGRVAVAVARAACGAGPEVLYYR--ASTPEFCRAAAVRAA-ARV-QWCPMRFRKMAETDSSRSISWMTVAS : 343
ARF16 : SLLRDEESNS-----LRRSNC--LADRKGTAESIEATLAIAGRPPEVLYYR--ASTPEFCRAAAVRAA-ARV-QWCPMRFRKMAETDSSRSISWMTVAS : 345
ARF17 : SSVAKEDGSP-----KKTFRRS-----GNKRTAEALTDINRASQGLFVYVYLA--AGWSEFVRAEDVSSSM-YVPTLTKVAMETDSSRSISWMTVAS : 340
-----a f p g r e
-----w s w wde vs w e

Os02g06910 : S---DLDPVPRKNSHNSKQWDESTAGEROPRVSLAEIPLTT-FMYPSFPLRLRFPWPTGLPS--LYGGKEDDLA--SSLMLL-RDSQNTFGQSLNFGGLGMPWMPQ : 430
Os06g46410 : S---DLDAARPNSHNSKQWDESTAGEROPRVSLAEIPLTT-FMYPSFPLRLRFPWPTGLPS--LYGGKEDDLA--SSLMLL-RDSANFGQSLNFGGLGMPWMPQ : 430
Os12g41950 : S---DLDSVRPNSHNSKQWDESTGTGKOPRVSLAEIPLTT-FMYPSAFLPRLRFPWAGLPMHMGVNGGNDDFARYSSLMWL-RDG-NRGTQSLNFGQSLNFGGLGMPWMPQ : 432
ARF6 : C---DLDPTRPNSHNSKQWDESTAGEROPRVSLAEIPLTT-FMYPSFPLRLRFPWPTGLPS--FHLGKEDDDG--MSMS-PLMWRDLGQSLNFGQSLNFGGLGMPWMPQ : 422
Os04g57160 : S---DADVPRPNSSHNSKQWDESTAGEROPRVSLAEIPLTT-FMYPSLFLPRLRHPWYSGVAS--LHDD----SNALMWRG-VAGEG-FQSLNFGQSLNFGGLGMPWMPQ : 430
ARF8 : S---DLDSVRPNSHNSKQWDESTAGEROPRVSLAEIPLTT-FMYPSLFLPRLRHPWYSGVAS--LHDD----SNALMWRG-VAGEG-FQSLNFGQSLNFGGLGMPWMPQ : 423
Os02g04810 : S---DLDPV-----GWDESAAGERNRVSIWEIPEVPAAPFLCIPPPP-FGVRPQO-LDD--ES-EMENLKRAMPWLGEVCEIKDPTQNTMPLGSLVQWMMN : 460
Os06g48950 : S---DLDPVPRKNSHNSKQWDESAAGERNRVSIWEIPEVPAAPFLCIPPPP-FGVRPQO-LDD--ES-EMENLKRAMPWLGEVCEIKDPTQNTMPLGSLVQWMMN : 418
Os08g40900 : S---DLDPVPRKNSHNSKQWDESAAGERNRVSIWEIPEVPAAPFLCIPPPP-FGVRPQO-LDD--ES-EMENLKRAMPWLGEVCEIKDPTQNTMPLGSLVQWMMN : 370
ARF7 : S---DLDPVPRKNSHNSKQWDESAAGERNRVSIWEIPEVPAAPFLCIPPPP-FGVRPQO-LDD--ES-EMENLKRAMPWLGEVCEIKDPTQNTMPLGSLVQWMMN : 424
ARF19 : S---DLDPVPRKNSHNSKQWDESAAGERNRVSIWEIPEVPAAPFLCIPPPP-FGVRPQO-LDD--ES-EMENLKRAMPWLGEVCEIKDPTQNTMPLGSLVQWMMN : 422
Os06g09660 : G---DLDPVPRKNSHNSKQWDESAAGERNRVSIWEIPEVPAAPFLCIPPPP-FGVRPQO-LDD--ES-EMENLKRAMPWLGEVCEIKDPTQNTMPLGSLVQWMMN : 423
Os04g56850 : S---DYPVPRKNSHNSKQWDEHYGGRPEVSIWEIPEVPAAPFLCIPPPP-FGVRPQO-LDD--ES-EMENLKRAMPWLGEVCEIKDPTQNTMPLGSLVQWMMN : 441
ARF5 : S---DLDPVPRKNSHNSKQWDEHYGGRPEVSIWEIPEVPAAPFLCIPPPP-FGVRPQO-LDD--ES-EMENLKRAMPWLGEVCEIKDPTQNTMPLGSLVQWMMN : 456
Os01g48060 : R---EADPM-HCSKRCCLARWDEDAFVCRPNVSIWEIPEVPAAPFLCIPPPP-FGVRPQO-LDD--ES-EMENLKRAMPWLGEVCEIKDPTQNTMPLGSLVQWMMN : 432
Os05g48870 : G---DTPM-HCSKRCCLARWDEDAFVCRPNVSIWEIPEVPAAPFLCIPPPP-FGVRPQO-LDD--ES-EMENLKRAMPWLGEVCEIKDPTQNTMPLGSLVQWMMN : 423
Os01g54990 : S---EVDPIRPNCSKRCCLARWDEDAFVCRPNVSIWEIPEVPAAPFLCIPPPP-FGVRPQO-LDD--ES-EMENLKRAMPWLGEVCEIKDPTQNTMPLGSLVQWMMN : 473
Os05g43920 : S---EVDPIRPNCSKRCCLARWDEDAFVCRPNVSIWEIPEVPAAPFLCIPPPP-FGVRPQO-LDD--ES-EMENLKRAMPWLGEVCEIKDPTQNTMPLGSLVQWMMN : 427
ARF3 : S---DLDPVPRKNSHNSKQWDEHYGGRPEVSIWEIPEVPAAPFLCIPPPP-FGVRPQO-LDD--ES-EMENLKRAMPWLGEVCEIKDPTQNTMPLGSLVQWMMN : 442
ARF4 : C---DLDPVPRKNSHNSKQWDEHYGGRPEVSIWEIPEVPAAPFLCIPPPP-FGVRPQO-LDD--ES-EMENLKRAMPWLGEVCEIKDPTQNTMPLGSLVQWMMN : 460
ARF11 : G---DLSSQPNASKNSKQWDEHYGGRPEVSIWEIPEVPAAPFLCIPPPP-FGVRPQO-LDD--ES-EMENLKRAMPWLGEVCEIKDPTQNTMPLGSLVQWMMN : 396
ARF18 : G---DLSSQPNASKNSKQWDEHYGGRPEVSIWEIPEVPAAPFLCIPPPP-FGVRPQO-LDD--ES-EMENLKRAMPWLGEVCEIKDPTQNTMPLGSLVQWMMN : 401
Os01g13520 : G---DLSSQPNASKNSKQWDEHYGGRPEVSIWEIPEVPAAPFLCIPPPP-FGVRPQO-LDD--ES-EMENLKRAMPWLGEVCEIKDPTQNTMPLGSLVQWMMN : 401
ARF9 : K---NLDV-VPESSSRKRCCLARWDEHYGGRPEVSIWEIPEVPAAPFLCIPPPP-FGVRPQO-LDD--ES-EMENLKRAMPWLGEVCEIKDPTQNTMPLGSLVQWMMN : 390
Os01g70270 : E---NLDV-VPESSSRKRCCLARWDEHYGGRPEVSIWEIPEVPAAPFLCIPPPP-FGVRPQO-LDD--ES-EMENLKRAMPWLGEVCEIKDPTQNTMPLGSLVQWMMN : 428
ARF2 : E---ESDPTRPNCSKRCCLARWDEHYGGRPEVSIWEIPEVPAAPFLCIPPPP-FGVRPQO-LDD--ES-EMENLKRAMPWLGEVCEIKDPTQNTMPLGSLVQWMMN : 463
Os11g32110 : G---DSBPAGPESSSRKRCCLARWDEHYGGRPEVSIWEIPEVPAAPFLCIPPPP-FGVRPQO-LDD--ES-EMENLKRAMPWLGEVCEIKDPTQNTMPLGSLVQWMMN : 430
Os12g29520 : G---DSBPAGPESSSRKRCCLARWDEHYGGRPEVSIWEIPEVPAAPFLCIPPPP-FGVRPQO-LDD--ES-EMENLKRAMPWLGEVCEIKDPTQNTMPLGSLVQWMMN : 446
Os02g35140 : G---SMTSPANASKNSKQWDEHYGGRPEVSIWEIPEVPAAPFLCIPPPP-FGVRPQO-LDD--ES-EMENLKRAMPWLGEVCEIKDPTQNTMPLGSLVQWMMN : 394
Os04g36054 : G---SMTSPANASKNSKQWDEHYGGRPEVSIWEIPEVPAAPFLCIPPPP-FGVRPQO-LDD--ES-EMENLKRAMPWLGEVCEIKDPTQNTMPLGSLVQWMMN : 394
ARF1 : Q---ENKSSVHDSKRCCLARWDEHYGGRPEVSIWEIPEVPAAPFLCIPPPP-FGVRPQO-LDD--ES-EMENLKRAMPWLGEVCEIKDPTQNTMPLGSLVQWMMN : 394
ARF12 : S---DPSPHKCSKRCCLARWDEHYGGRPEVSIWEIPEVPAAPFLCIPPPP-FGVRPQO-LDD--ES-EMENLKRAMPWLGEVCEIKDPTQNTMPLGSLVQWMMN : 398
ARF22 : S---DPSPHKCSKRCCLARWDEHYGGRPEVSIWEIPEVPAAPFLCIPPPP-FGVRPQO-LDD--ES-EMENLKRAMPWLGEVCEIKDPTQNTMPLGSLVQWMMN : 396
ARF20 : N---DPSPHKCSKRCCLARWDEHYGGRPEVSIWEIPEVPAAPFLCIPPPP-FGVRPQO-LDD--ES-EMENLKRAMPWLGEVCEIKDPTQNTMPLGSLVQWMMN : 382
ARF21 : S---DPSPHKCSKRCCLARWDEHYGGRPEVSIWEIPEVPAAPFLCIPPPP-FGVRPQO-LDD--ES-EMENLKRAMPWLGEVCEIKDPTQNTMPLGSLVQWMMN : 398
ARF15 : S---DPSPHKCSKRCCLARWDEHYGGRPEVSIWEIPEVPAAPFLCIPPPP-FGVRPQO-LDD--ES-EMENLKRAMPWLGEVCEIKDPTQNTMPLGSLVQWMMN : 403
ARF14 : S---DPSPHKCSKRCCLARWDEHYGGRPEVSIWEIPEVPAAPFLCIPPPP-FGVRPQO-LDD--ES-EMENLKRAMPWLGEVCEIKDPTQNTMPLGSLVQWMMN : 398
ARF23 : -----LSSDSHIGLIAAARAAATNSRITVFYNER--ASPSEFVPLAKVKAHYHTRISVGMRFRLMTEESS-VRRMMEITG : -
ARF13 : N---DMSPHKCSKRCCLARWDEHYGGRPEVSIWEIPEVPAAPFLCIPPPP-FGVRPQO-LDD--ES-EMENLKRAMPWLGEVCEIKDPTQNTMPLGSLVQWMMN : 393
Os02g41800 : Q---VADPIRPNCSKRCCLARWDEHYGGRPEVSIWEIPEVPAAPFLCIPPPP-FGVRPQO-LDD--ES-EMENLKRAMPWLGEVCEIKDPTQNTMPLGSLVQWMMN : 429
Os04g43100 : Q---VADPIRPNCSKRCCLARWDEHYGGRPEVSIWEIPEVPAAPFLCIPPPP-FGVRPQO-LDD--ES-EMENLKRAMPWLGEVCEIKDPTQNTMPLGSLVQWMMN : 434
Os06g47150 : Q---VADPIRPNCSKRCCLARWDEHYGGRPEVSIWEIPEVPAAPFLCIPPPP-FGVRPQO-LDD--ES-EMENLKRAMPWLGEVCEIKDPTQNTMPLGSLVQWMMN : 449
Os10g33940 : Q---VADPIRPNCSKRCCLARWDEHYGGRPEVSIWEIPEVPAAPFLCIPPPP-FGVRPQO-LDD--ES-EMENLKRAMPWLGEVCEIKDPTQNTMPLGSLVQWMMN : 445
ARF10 : Q---VADPIRPNCSKRCCLARWDEHYGGRPEVSIWEIPEVPAAPFLCIPPPP-FGVRPQO-LDD--ES-EMENLKRAMPWLGEVCEIKDPTQNTMPLGSLVQWMMN : 436
ARF16 : N---VSDPIRPNCSKRCCLARWDEHYGGRPEVSIWEIPEVPAAPFLCIPPPP-FGVRPQO-LDD--ES-EMENLKRAMPWLGEVCEIKDPTQNTMPLGSLVQWMMN : 436
ARF17 : Y---QETG-PHRSKRCCLARWDEHYGGRPEVSIWEIPEVPAAPFLCIPPPP-FGVRPQO-LDD--ES-EMENLKRAMPWLGEVCEIKDPTQNTMPLGSLVQWMMN : 433
-----w s w wde vs w e

```

|            |   |                                      |   |     |   |     |   |     |   |     |   |     |   |   |
|------------|---|--------------------------------------|---|-----|---|-----|---|-----|---|-----|---|-----|---|---|
| Os02g06910 | : | RLDSS-LLGLQPDYQTI AAAA               | * | 700 | * | 720 | * | 740 | * | 760 | * | 780 | * | 8 |
| Os06g46410 | : | RFDAS-LLGLQPDYQTI AAAA               |   |     |   |     |   |     |   |     |   |     |   |   |
| Os12g41950 | : | RIDSF-LLGLKPDYQMAAAA                 |   |     |   |     |   |     |   |     |   |     |   |   |
| ARF6       | : | RLDTSGLLGMQNDVYQMAAAA                |   |     |   |     |   |     |   |     |   |     |   |   |
| Os04g57610 | : | RLHPSLLSSSDHD-QYQAVAAA               |   |     |   |     |   |     |   |     |   |     |   |   |
| ARF8       | : | RLLSQMGFDNNOQYQAMLAAG                |   |     |   |     |   |     |   |     |   |     |   |   |
| Os02g04810 | : | NROQSSSLANTAQSEYLQALG-NPAMONLAAD     |   |     |   |     |   |     |   |     |   |     |   |   |
| Os06g48950 | : | NMQSSSFANTAMQSEYLRLSL-NFMNQNLGAA     |   |     |   |     |   |     |   |     |   |     |   |   |
| Os08g40900 | : | -QHSSSLPGTVVQPELNLNLS-GKPVQNLAAA     |   |     |   |     |   |     |   |     |   |     |   |   |
| ARF7       | : | QQNQQLPFAAAQPFPPSMLSPTAALHNNLGG      |   |     |   |     |   |     |   |     |   |     |   |   |
| ARF19      | : | QQNFPLSGSATPQ--LPSALS-SFNLNNFA--     |   |     |   |     |   |     |   |     |   |     |   |   |
| Os06g09660 | : | QQ-NFQMLTAASQTVQSPYLNALAMQDVMGSSNEDP |   |     |   |     |   |     |   |     |   |     |   |   |
| Os04g56850 | : | GOTLGSPLSFHQSSYSIIQNVKQNYIPLTVSTSA   |   |     |   |     |   |     |   |     |   |     |   |   |
| ARF5       | : | -----PHNNQNVPSFMSEMQQN-----          |   |     |   |     |   |     |   |     |   |     |   |   |
| Os01g48060 | : | ELLLKTRDGTVNTASQATEAR                |   |     |   |     |   |     |   |     |   |     |   |   |
| Os05g48870 | : | ELLLFKSHGGTAAATSQPCEAR               |   |     |   |     |   |     |   |     |   |     |   |   |
| Os01g54990 | : | ELMGSRTHR--ATCSQPSQIDIT              |   |     |   |     |   |     |   |     |   |     |   |   |
| Os05g43920 | : | EFRGSRSHG--VVCSS-ESGPV               |   |     |   |     |   |     |   |     |   |     |   |   |
| ARF3       | : | ETFP---GFINTCS DGGAGAR               |   |     |   |     |   |     |   |     |   |     |   |   |
| ARF4       | : | ENIG-----SASPSQGFVDM                 |   |     |   |     |   |     |   |     |   |     |   |   |
| ARF11      | : | N-----                               |   |     |   |     |   |     |   |     |   |     |   |   |
| ARF18      | : | I-----                               |   |     |   |     |   |     |   |     |   |     |   |   |
| Os01g13520 | : | TGIGSEPNCSHGQVVMVPEH                 |   |     |   |     |   |     |   |     |   |     |   |   |
| ARF9       | : | AQS-----                             |   |     |   |     |   |     |   |     |   |     |   |   |
| Os01g70270 | : | NDSVDTAHKPMMSPSFNAKA                 |   |     |   |     |   |     |   |     |   |     |   |   |
| ARF2       | : | VECDAPENS-VVMQSSADDDKV               |   |     |   |     |   |     |   |     |   |     |   |   |
| Os11g32110 | : | SELES-AQKIMRPSGDFREKN                |   |     |   |     |   |     |   |     |   |     |   |   |
| Os12g29520 | : | NELNT-SQKLTMMSSGNSQEK                |   |     |   |     |   |     |   |     |   |     |   |   |
| Os02g35140 | : | -LWKSSAE                             |   |     |   |     |   |     |   |     |   |     |   |   |
| Os04g36054 | : | -LWKFPSE                             |   |     |   |     |   |     |   |     |   |     |   |   |
| ARF1       | : | -VMKSPAD                             |   |     |   |     |   |     |   |     |   |     |   |   |
| ARF12      | : |                                      |   |     |   |     |   |     |   |     |   |     |   |   |
| ARF22      | : |                                      |   |     |   |     |   |     |   |     |   |     |   |   |
| ARF20      | : |                                      |   |     |   |     |   |     |   |     |   |     |   |   |
| ARF21      | : |                                      |   |     |   |     |   |     |   |     |   |     |   |   |
| ARF15      | : |                                      |   |     |   |     |   |     |   |     |   |     |   |   |
| ARF14      | : |                                      |   |     |   |     |   |     |   |     |   |     |   |   |
| ARF23      | : |                                      |   |     |   |     |   |     |   |     |   |     |   |   |
| ARF13      | : |                                      |   |     |   |     |   |     |   |     |   |     |   |   |
| Os02g41800 | : |                                      |   |     |   |     |   |     |   |     |   |     |   |   |
| Os04g43910 | : |                                      |   |     |   |     |   |     |   |     |   |     |   |   |
| Os06g47150 | : |                                      |   |     |   |     |   |     |   |     |   |     |   |   |
| Os10g33940 | : |                                      |   |     |   |     |   |     |   |     |   |     |   |   |
| ARF10      | : |                                      |   |     |   |     |   |     |   |     |   |     |   |   |
| ARF16      | : |                                      |   |     |   |     |   |     |   |     |   |     |   |   |
| ARF17      | : |                                      |   |     |   |     |   |     |   |     |   |     |   |   |

|            |   |               |   |     |   |     |   |     |   |     |   |     |   |
|------------|---|---------------|---|-----|---|-----|---|-----|---|-----|---|-----|---|
| Os02g06910 | : | GNS           | * | 820 | * | 840 | * | 860 | * | 880 | * | 900 | * |
| Os06g46410 | : | ETT           |   |     |   |     |   |     |   |     |   |     |   |
| Os12g41950 | : | QGH           |   |     |   |     |   |     |   |     |   |     |   |
| ARF6       | : | QQQ           |   |     |   |     |   |     |   |     |   |     |   |
| Os04g57610 | : | TML           |   |     |   |     |   |     |   |     |   |     |   |
| ARF8       | : | TOI           |   |     |   |     |   |     |   |     |   |     |   |
| Os02g04810 | : | RO            |   |     |   |     |   |     |   |     |   |     |   |
| Os06g48950 | : | RO            |   |     |   |     |   |     |   |     |   |     |   |
| Os08g40900 | : | RQHVVTPQ      |   |     |   |     |   |     |   |     |   |     |   |
| ARF7       | : | QLQSSQHSNNSQS |   |     |   |     |   |     |   |     |   |     |   |
| ARF19      | : | QLQMSQ        |   |     |   |     |   |     |   |     |   |     |   |
| Os06g09660 | : | HLQKQSS       |   |     |   |     |   |     |   |     |   |     |   |
| Os04g56850 | : | SKGEPFR       |   |     |   |     |   |     |   |     |   |     |   |
| ARF5       | : | STLSC         |   |     |   |     |   |     |   |     |   |     |   |
| Os01g48060 | : | CSGFGE        |   |     |   |     |   |     |   |     |   |     |   |
| Os05g48870 | : | CSGFGE        |   |     |   |     |   |     |   |     |   |     |   |
| Os01g54990 | : | SVSFGE        |   |     |   |     |   |     |   |     |   |     |   |
| Os05g43920 | : | PIGFSE        |   |     |   |     |   |     |   |     |   |     |   |
| ARF3       | : | GTEFGD        |   |     |   |     |   |     |   |     |   |     |   |
| ARF4       | : | CSGVMD        |   |     |   |     |   |     |   |     |   |     |   |
| ARF11      | : | VKL           |   |     |   |     |   |     |   |     |   |     |   |
| ARF18      | : | SLK           |   |     |   |     |   |     |   |     |   |     |   |
| Os01g13520 | : | SQK           |   |     |   |     |   |     |   |     |   |     |   |
| ARF9       | : | PQQ           |   |     |   |     |   |     |   |     |   |     |   |
| Os01g70270 | : | PG            |   |     |   |     |   |     |   |     |   |     |   |
| ARF2       | : | HG            |   |     |   |     |   |     |   |     |   |     |   |
| Os11g32110 | : | IPQGF         |   |     |   |     |   |     |   |     |   |     |   |
| Os12g29520 | : | NP--LS        |   |     |   |     |   |     |   |     |   |     |   |
| Os02g35140 | : | LN            |   |     |   |     |   |     |   |     |   |     |   |
| Os04g36054 | : | SH            |   |     |   |     |   |     |   |     |   |     |   |
| ARF1       | : | IG            |   |     |   |     |   |     |   |     |   |     |   |
| ARF12      | : | NI            |   |     |   |     |   |     |   |     |   |     |   |
| ARF22      | : | NI            |   |     |   |     |   |     |   |     |   |     |   |
| ARF20      | : | NT            |   |     |   |     |   |     |   |     |   |     |   |
| ARF21      | : | NI            |   |     |   |     |   |     |   |     |   |     |   |
| ARF15      | : | NI            |   |     |   |     |   |     |   |     |   |     |   |
| ARF14      | : | NI            |   |     |   |     |   |     |   |     |   |     |   |
| ARF23      | : |               |   |     |   |     |   |     |   |     |   |     |   |
| ARF13      | : | SVP           |   |     |   |     |   |     |   |     |   |     |   |
| Os02g41800 | : | Q-FGFS        |   |     |   |     |   |     |   |     |   |     |   |
| Os04g43910 | : | Q-FASP        |   |     |   |     |   |     |   |     |   |     |   |
| Os06g47150 | : | Q-FGIS        |   |     |   |     |   |     |   |     |   |     |   |
| Os10g33940 | : | Q-FGLP        |   |     |   |     |   |     |   |     |   |     |   |
| ARF10      | : | QLLFGSPS      |   |     |   |     |   |     |   |     |   |     |   |
| ARF16      | : | HQYGLS        |   |     |   |     |   |     |   |     |   |     |   |
| ARF17      | : |               |   |     |   |     |   |     |   |     |   |     |   |



```

Os02g06910 : -----920-----*-----940-----*-----960-----*-----980-----*-----1000-----*-----1020-----
Os06g46410 : -----IQGHSQPEYLQQLPQHCQSFNEQKPLQPPQQQ-----QESHQQQ-----PQHQQMQQKHLNS : 558
Os12g41950 : -----CQNTGDSGFLQQLPRLQLHN-----TQQLLKE-----QELQQQQ-----SQCMQVPHQMQQKQNMNTN : 568
ARF6 : -----LSQQQQQLSQQQQQQLSQQQQQQLSQQQQQQAY-----LGVFETHQQPQSQ-----AQSQSNHLSQQQQQV : 565
Os04g57610 : -----SFA-----TQQLLQQLQQQ-----QVNDQ-----KQIQP-----DQSVQVPT : 545
ARF8 : -----MSEN-----LFGQNMREQVSN-----QFAGQQ-----QQLQQP-----DQNYLN : 536
Os02g04810 : QRLLLSHQQ--KDNQLLQQLLLQQLQQQQQQQ--QNOQLN-----KSLGQLVNLASQQSK-LFDEELQQLLQQLQQ--SLMSQSTTSLSPPLIQEQKLLIT : 698
Os06g48950 : QPILLPQQ--QQGQQQQQQQQQQQKLLQQQQQLLQQQQQLS-----KMPAQLSSLANQQFO-LTDQQLQLLQQLKQLQQQQSLLSQVATLQPLIQEQKLL : 661
Os08g40900 : QQLLQQQQPHVHQQLPQQLHHQQOQOQLQPQVQVQVQEQHQIK-----IQPVHVSMDASMNTQ-VADHQMLQLLQKALQO-----QPLISQKMLL : 623
ARF7 : SVVITPPSSSLNQSFOQQQQSKQLQAHHLGASTSOSSVIETSKSSSNLMSAPPQETQFSRQVQEQPPGLNGOQOQLLQKRAHQ-----QAQIFPQSLLEQP : 748
ARF19 : NKGLS-CMTSFAEQMOPQQ--LEMNNSQLLNQEQSSLSHLQQN-----LSONPQQLMQQQSSKPSP--SQQLQLLQQLKQLQQQ--QQQSIPIVSSSLQP : 672
Os06g09660 : SPTHRLQGLTGLPIAGSLQP--TLTQTSVQVAAEQALLQSQOQ-----QOQLLQQLSQ-----PEVQLQLLQKIQOQ-----NMLSQLNPGHS : 675
Os04g56850 : -GKTRRSKGLPHKTVSEKSDLSAPSICDNQVQV-----LESKLVG-----CDEQVNCGNIE : 602
ARF5 : -CSSGRVQHGL-EQSMEQASQVTTST--VCNEKVN-----QLLQKPG-----ASSPVQADQCL : 589
Os01g48060 : -SQRFEVLQGGQVFR--PYRGGTSLDACIR-----PYRG-TLVDASMG : 526
Os05g48870 : -SHRLQKVLQGGELFR--PYRG-TLVDASMG : 516
Os01g54990 : -SIGFPEVLQGGQEQISQTV--PPFQG-MLFPDACA : 565
Os05g43920 : -SLGFEVLQGGQEQSQTV--PLFRG-ATFGARTQ : 516
ARF3 : -SIGFHKVLQGGQETV : 486
ARF4 : -LDRFPRVLQGGQEQICSLKSPFQAG-FSPAANP : 551
ARF11 : -LFQDPATERNSNKVSFSSGLQCKITEAPVTS : 433
ARF18 : -LFQDPSLERISGGYSNNSFKPETPPPTNC : 438
Os01g13520 : -IFQVTSNEARIATWPARSAYQAEPTSKLSS : 495
ARF9 : -CHRANEDAKKSDWLNLSYSVNVAKDSTLN : 435
Os01g70270 : -FFMNFDEAFNRLTSFKNQFD-QGSARHFS : 520
ARF2 : -QRIPFYDHSSSPMAKRI LSDSEGKFDYLAN : 556
Os11g32110 : -SLPEQITAGHSNFHWTVNAQYDQQSNHNMFP : 526
Os12g29520 : -SFPQSISGNRSNTWNTINVHYPDQANHNMFPG : 540
Os02g35140 : -VGFSTKNEPSALSXKHFYWPMPRETRANSYA : 462
Os04g36054 : -VEFNSKNEPILSN-QFYWSMRDSTKTSFSA : 461
ARF1 : -SAFWPTN--ADSAESFAS : 448
ARF12 : -SLRYRDATEDAMNPSKLLMSYVQVPMKLNYN : 438
ARF22 : -SLTYRDITTEDVMPNPSRLLMSYVQVPMKLNYN : 436
ARF20 : -SLRYRDITTEDAMNPSRLLMSYVQVPMKLNYN : 422
ARF21 : -SLRYRDITTEDAMNPSRLLMSYVQVPMKLNYN : 438
ARF15 : -SLLYRBTEDAMNPSRLLMSYVQVPMKLNYN : 443
ARF14 : -SLRYRDI TEDAMTPSRLLMSYVQVPMKLNYN : 438
ARF23 : ----- : -
ARF13 : -EFSYPAIEDSKFLSGLLNHLSLAI PNENYNS : 435
Os02g41800 : -LSDLHLTHLQ-SLMYPGLRRP--DHVGP : 482
Os04g43910 : -FPEFHIGNLPNMLYAGIRLFPADRAAP : 490
Os06g47150 : -LSDLHLNKLQSSLSPHG-LHQLDHGMQP-R : 497
Os10g33940 : -LTDHQLNKLHLGLHSGSNRDLAITPPSR : 495
ARF10 : -PSLLSDNLSSYTGNKLSHPAMFLSSFNPR : 490
ARF16 : -SSDLHHYILNRPPPPPPSSLQLSPSLG : 487
ARF17 : -QYDFGSFNR : 454

```

```

Os02g06910 : -----*-----1040-----*-----1060-----*-----1080-----*-----1100-----*-----1120-----*-----1140-----
Os06g46410 : FQTVFNAL-----SVFSQLSSTPQSTPST-----LQTVSPFQQHNFDPDTNISCLSPSM--VSS : 610
Os12g41950 : YQSVFNAL-----SPFQLSSPQSSPMT-----LQTVLFPQQSYDPDTSMSLSPSM--TST : 620
ARF6 : QOQLPSSD-----HHVADVAESGSAPOA-----QSSLSSGS--SFYNQMLEGNSDP--PLH : 607
Os04g57610 : DNHNFSASSAAVVSAMSQFSAQNPSTP-----LQSMTSLCHQQSFDSTN--GNNP--ISP : 619
Os02g04810 : SAVLPSPT-----SLPSHLREKFG-----FSDPNANSSSFT--SSS : 580
ARF8 : --AFKMQN-----GHLQWQQQSE-----MPSPFMSKSDTD--SSN : 569
Os02g04810 : DMQKQLSN-SHSLAQQQMMPQEQEIKPQLQ-----ATPLLPVQQEQQQLKQVSLADSVGVAFQPISSSTNVIKPTGGAMIISGATQSVVTEE--MPCSTSPSTANG--NHF : 802
Os06g48950 : DMQOQLSN-SQTLSQQQMMPQEQSTKVPSQ-----NTPLPLVQQEQPQKLLQKQAMLADTSEAAVPPTSVNVI STTGSPMLTTGATHSVLTEE--IPCSSTSPSTANG--NHL : 765
Os08g40900 : DLQQQVIN-SQSAPOCVQVTNQAI SLHN-----SNTIQYPTQVQVSHQVQ-----DLTGNVIPNSKSDIATSMGASSLHVAGGRQLKTD--VPSTSPSTNSN--PVL : 721
ARF7 : HIQFQLLRLQOQQQQQLSPOQLPHHQLSQOQLPQLTSLQG-HQFPSSCTNNGSLTLPQQLVSRPQE--KQNPVVGQVKASGIDGGDAPSSSTSPSTNCC--QIS : 856
ARF19 : --QLSALQOQHQHQLLSSQOQP-----LAHGNNSPFAS-----TFMQPPIQVSPQQQGMKNKLVAAGRSHSGHTDG-EAPCSSTSPSANNTHGDVNS : 763
Os06g09660 : QLIIQLLSQKSQELQQQILQHQFGGS-----DSIGLQKQS-----PSQAPLNHMT-----GSLTPQLVRSLSALAES-GDPSSTAPSTS--RIS : 754
Os04g56850 : DSSGALTGQNFVQPHGQVQKGVLSPP-----KVESKSPDGGKSVNSFFNQGCFQSIIDGLDMMTQPSYIQDSNVIQE--AGV : 681
ARF5 : DITHQIYQ-----PQSDPINGSFLETD-----ELTS-----QVSSFQS-----LAGSYKQPFILSS--QDS : 639
Os01g48060 : -----SNGFHQDSPRAPGVVN----- : 533
Os05g48870 : -----KSRVELKNYVCTPATMN----- : 582
Os05g43920 : -----NDRVVSANSVHRSAAQS----- : 533
ARF3 : -----AYSITHRQGHLSQRN----- : 503
ARF4 : -----PFAYQANKSSYYPLALH----- : 568
ARF11 : -----S----- : 434
ARF18 : -----S----- : 439
Os01g13520 : -----NTAACGYRTEEVAPNASK----- : 513
Os01g70270 : -----DQMVSPVEQKLPETTAN----- : 452
ARF2 : -----PYYYVSPQSLTVESTQ----- : 538
Os11g32110 : -----QWQMHSGLSLKLHESPK----- : 574
Os12g29520 : -----SWSFMPFNTRLGLNKQNY----- : 544
Os02g35140 : -----TWSLMPFMTGFVGNQQNY----- : 558
Os04g36054 : -----SISKVPS----- : 470
ARF1 : -----STNKTRVE----- : 469
ARF12 : -----AFNNESTE----- : 456
ARF22 : -----NQMVTEEE----- : 447
ARF20 : -----NQMVTQIEE----- : 445
ARF21 : -----NQMVTQIEE----- : 431
ARF15 : -----NQMVTQIEE----- : 447
ARF14 : -----NQMVTQIEE----- : 452
ARF23 : -----N-VVTPIEE----- : 446
ARF13 : -----DQMIQPRKE----- : 444
Os02g41800 : -----TSIPP-FRISTDLTMGSS----- : 499
Os04g43910 : -----APRPPRI IISTDLTIGSP----- : 508
Os06g47150 : -----IAAGLIIGHFAARDISCLLIGSP----- : 522
Os10g33940 : -----ISKGFVSSAFADNISCLLIGSP----- : 520
ARF10 : -----HHYQARDSENSNNISCLLTMGNP----- : 514
ARF16 : -----LRNIDTKMEKGCPLMGT----- : 507
ARF17 : -----TGFIGGNP----- : 462

```

Os02g06910 : MHDTRLSFPSE-----1160-----\*-----AASDLPGVPRITPVVPSVDSSKRVAVESTITS-----\*-----1200-----\*-----RPHDISSQIENFDLTPSS-----\*-----1220-----\*-----IPQNSTLAPLPG-RECLVDQDG : 693
Os06g46410 : MHNALRPFSS-----\*-----1180-----\*-----APSHLS-MPRPTAVVDPVDFWSSKRVAVESLIFS-----\*-----RQ-VTSQMEQLDSTAPS-----\*-----IPQSSALAPLPG-RGCLVDQDG : 701
Os12g41950 : LHNHFNFSSQ-----\*-----EASNLLILPRSSQLMSDGDWSSKRVAVESLIFS-----\*-----EAPSMHPKIEKVNHGQIS-----\*-----HFFPG-AFFPQSA-RGCLVQDC : 689
ARF6 : LHTLLSNFSQD-----\*-----ESSQLLHLTRTNSAMTSSGWFSPKRPAVDSFSFQHS-----\*-----GAGNNNTQSVLEQLGQSHTSNVPPNVAVSLFPFPGGRCESIEQEG : 708
Os04g57610 : SDNMLDSSFLQ-----\*-----GSSKAVDLRSFNQPVASEQQQQQKAWKQFMG-----\*-----SQSVSFGSSVLIHNSPTS-----\*-----KDSVVEN-K : 649
ARF8 : K-FATASPAS-----\*-----GQNLNLFSTITGQSVLEPEQLTTEG--WSFKASN-----\*-----TSEPLS-----\*-----LPQRYG-----\*-----KSLALE-----\*----- : 630
Os02g04810 : TQST--KNRKC--INTERLPPSTAPMLPTS DAVTATPMLTKELPKPNNVQSVVNSKLNVAFGP-QNCINHALQTDNLETSSATSCEPSR-TDGLVHQGFPSMNFHQH : 910
Os06g48950 : LQPIILGRNKHCSMINTKVPQSAAPMSVSSLEAVTAPRMMKDSPLKHNHVQSVVASKLANAGTGS-QNYVNNPPTDYLETASSATVWLSQ--NDGLLHQFPMNSNFQPO : 877
Os08g40900 : LQSPSSSKNQ-----\*-----SLTAGTKSSQSVLGPTEIQDT--KPQVNVKQVTMIKPTTEQRFPATGQDCINNNPQMDYLTSSATSUCLSQ--ADGSLQONFPPSSFHQH : 822
ARF7 : SSGFLNRSQS-----\*-----GPAILLPDAADMSDGNLVDQLYSKSDMRLKQELVGGQKS-----\*-----KASLTDHQLEASAGSTSYGLDG--GENNRQNFPAVSTFDGLD : 945
ARF19 : PTNLSRNQOQ-----\*-----GQAASVSASDSVFERASNPVQELTYKTESRIQGMNMMKSAGE-----\*-----HFRKSAVTDQIDVSTAGTYPVDPVGVQOQTFPLPSFGFDG : 861
Os06g09660 : PINLSRANQ-----\*-----GSRNLTDMVATPQIDNLLQEQSKPDRIKNDIQSKETVP-----\*-----IHNHRPVSQQLDASSA--TSCFDE-----\*-----SPREGFSFPVCLDN : 842
Os04g56850 : SENIFSSADIPP-----\*-----SMIADTMEFTAQSCSLDCLPNSIQEPISSPDLSL-----\*-----TFLSPDMQNLVQLQHQHGNLPSTNSVQMSFSEESASQSA : 771
ARF5 : SAVVLPDSTNSP-----\*-----LFHDVDTQLNGLKFDQFSLMQDLYAS-----\*-----QNICMSNSTSNILD-----\*-----PPLSNTVLDFFAKIDTDFQN : 716
Os01g48060 : -----\*-----KWLAPQG--CDHHGITTSVLP--QASSPSSVLMFPQTSKMP : 581
Os05g48870 : -----\*-----KWQQLHGRAAFHGGPPALPQSSSSPPSFLMFPQANSKMP : 574
Os01g54990 : -----\*-----GLSSANEG--YCLSLSTVPPS-----\*-----PSSLMLYQTF--VP : 614
Os05g43920 : -----\*-----GLLASTLG--HPSQFTLSSSKVSSPSSVLMFNQAT--AP : 569
ARF3 : -----\*-----IWCQFPQ--FSTRLLPSSVSSSSPSSVLLTNSNS-----\*----- : 535
ARF4 : -----\*-----GIRSTHV--YQNYVAGNGQSGGPPSRAINFGEERKFD : 605
ARF11 : -----\*-----CRLEGFDTSKPASATPHDKQLISVDNSIS : 465
ARF18 : -----\*-----YRLFQDITSN-SPAPIQDQKPMQTCG-- : 466
Os01g13520 : V-----\*-----VEGKKEPAMRLEFGVDLMMKCTSISTTDRKSSVAGEASA : 554
ARF9 : -----\*-----YRLFQDITSN-SLAVPEEKATPMPRINISK : 482
Os01g70270 : MHTDS-----\*-----KELHFWNGQSTVYG--NSRDRPQNFRFEQNSSWLNQSFARPEQPRVIRPHASIAPVLEKTEGSGFKIFGKVDTTANPNHLSMMAHTEPMLQ : 638
ARF2 : VPAATDASLQRCNRYKSEYVPLNGLSTENAGGNWPIRPAALNYEEVNVAAQQAQAR--EQVTKQFPTIQEETAKSREGN-CRLEGFIPITNN--MNGDSTMTQRNN--LN : 679
Os11g32110 : SMIEAGVLSQR--PGNTKFG-NGVYAAALPGRGTEQYSGWGHMMMPNSHMDTQPR--LIKPKPLVVAHQDQVQKAGSCKLFGIHLDSAP-AKPELLSPSSVYVYDGTPO : 649
Os12g29520 : LMTPII-TLQPR--SLNAKFGNGAFTSLRAHGIQDRSSGWLGHIEPSSHIDDASS--LIKPKPLVIDH-NVQKAGSSCKLFGIHLDSAP-AKPELLSPSSVYVYDGTPO : 662
Os02g35140 : -----\*-----KQEPSSAGCRLEFIESS--AVEATSPLAAVSG-VQGD : 506
Os04g36054 : -----\*-----RKQEPMTGCRLEFIESS--AVEEALPAATVSG-VGYD : 505
ARF1 : -----\*-----KKQ-TNGNVCRLEFIEFVEN-VNVDECFAASVSGAVVD : 494
ARF12 : -----\*-----NITTKGTNFRLEFVTEIDTPPVKIDFIEEIGSEISKLTEG : 487
ARF22 : -----\*-----NITTKGTNFRLEFVSEVTPSVIKDFIEEIGSEISKLTEG : 485
ARF20 : -----\*-----NITTKAVTMFRLEFVSEVTPSVIKDFIEEIGSEISKLTEG : 471
ARF21 : -----\*-----NITTKACTNFRLEFVTEIDTPPVKIDFIEEIGSEISKLTEG : 487
ARF15 : -----\*-----NITTKACTNFRLEFVSEVTPSVIKDFIEEIGSEISKLTEG : 492
ARF14 : -----\*-----NITTNVAVSFRLEFVSEVTPSVIKDFIEEIGSEISKLTEG : 486
ARF23 : -----\*----- : -
ARF13 : -----\*-----DITTEATTSCLLFGVDITKRVSKSKSDICPIES--CKKSEI : 482
Os02g41800 : -----\*-----PPARALSMGAKFPDDAKPGLMLFGORILTERQMSL--SGTSPAA : 543
Os04g43910 : GKPD-----\*-----DAACSPSSGGKIDDTKPRGFLFGQAILTEEQIKN--GNSDGRA : 556
Os06g47150 : -----\*-----QNNKSDGKKAQALMLFGKPILTEQQISLGDAAVSVK : 562
Os10g33940 : -----\*-----QVAEKSDDRKTPHIMIFGKAIFFEQQITS--SGSTETLS : 558
ARF10 : A-----\*-----MVQDKKSVGSKTHQFVLFQGPILTEQVMM--RKRFLS : 553
ARF16 : -----\*-----PCNDTKSKSHIVLFGKLIPEEQLE--KYSTDTAN : 542
ARF17 : -----\*-----PQFTNNFLSPLDGLG--KVSTEMMN : 486

Os02g06910 : SS-----1260-----\*-----DPQNHFLFGVNIQSLLMQ-----\*-----1280-----\*-----DGIPS-----\*-----1300-----\*-----LHNENSSSTIPIYSTSNFLSPSQDDYPLSQTLTT-PCGLDESGVPCSDNAD : 770
Os06g46410 : NS-----\*-----DPQNHLLFGVNIQSLLMQ-----\*-----GGIPS-----\*-----LQGENSTAIPIYSTSNFLSPSQNDPFLDQLTSS--ADCLDESGVPCQNSD : 778
Os12g41950 : RA-----\*-----DAENRLLS-----\*-----SSFELO-----\*-----DGMTS-----\*-----LITDANRETDMALP-LRYSAGDLTENTLAT--SNCLGSGTFNPNLN-I : 758
ARF6 : SAS-----\*-----DPHSLLFGVNIQSLLMQ-----\*-----NGMSN-----\*-----LRSIEGGDSTLPTSSNFNNDGSGNLAMTTPSSCIDESGFLSLENL : 787
Os04g57610 : IGR-----\*-----DVQNSQLSFPQVD--SSLLY-----\*-----NMVFN-----\*-----LTS-NVSDGNLSTIPSGSTYLQNYAMG-----\*-----CLDSS--GLLQNTG : 716
ARF8 : -PG-----\*-----NPNQPSLFGVDPD-SGLFLP-----\*-----STVPR-----\*-----FAS-SGDAEASPSMLTDSGFQNSLYS-----\*-----CMQDTHLLHGAGQ : 697
Os02g04810 : MFKDALPDEMVEGDPNSGLFGINNMLLGFPI--ETEDLLINALDSVYKQNHISTDVENNYPMQKDALQEISTSMVS-QSFGQSDMAFN--SISDA-INDGAFLNK-SWP : 1016
Os06g48950 : MFKDAPDAEIAHAANTSNNALFGINGDGLGFFGLGTDLFLSNGIDAAKYENHISTEIDNSYRIPKDAQEISSSMVS-QSFGQSDMAFN--SISDT-INDGGLNRS-SWP : 985
Os08g40900 : LKKTVDPSFEVTPDPNNLLFGVNIQDQLGLPLN--ADLLANDIGTDKYMQLPQNGISNFISSKDSQELSSMSI-HSFGVADMAFN--SISDA-INDPFLNRS-SRS : 927
ARF7 : -----\*-----DSRNSLLGANVDFVDPD--LILSRGYSQKDLQNLMSNYG--GVTNDIGTEMSTSAVRTQSGVGNVPP--AISNDLA-VNDAGVLGGG-LWP : 1031
ARF19 : -----\*-----DCQSHHPR-NNLAFNGLEA--VTSDFLYSQKDFQNLVNYG--NTPRDIETELSSAIISSQSGPIPSIFPKPGCSNVEGGINSGMLNGGGLVP : 951
Os06g09660 : NVQ-----\*-----VDPRDNFLIAENV--ALMPDA--LLSRGMASQKGMCTLTSGQ--RDHRDVENELSSAASFSSQSGVGDMSFKPGCSSDVA-VTDAGMPQSG-LWN : 933
Os04g56850 : NLSG-----\*-----LHMESTHRSINTTSCSQPMSTGG-----\*-----FDAGMYSK-----\*-----LPRLKEQQLSLEIHTNS--MGTSACS-----\*-----MDATEYSIDRSKAP-- : 846
ARF5 : HPSG-----\*-----CLVGNNTSFAQDVQSQITSAS-----\*-----FADSQAFSRQDFDNDSSGGTSSSN--SISDT-INDGGLNRS-SWP : 783
Os01g48060 : G-----\*-----LEIYICLDLDRNENSRHFKIGPTDQMTTQTLR : 615
Os05g48870 : R-----\*-----LEFGHQDLKHENRRVRFSGSEIERRQRIP : 608
Os01g54990 : Q-----\*-----LELAKNNDKSGNDSQP--ALR-----\*-----HETVSGTNNKGMHVSQF--ASQEMLESEVTPW : 600
Os05g43920 : N-----\*----- : -
ARF3 : -----\*----- : -
ARF4 : AQNEG-----\*-----GLPNVNTADLPFKIDMMGKQKGSLENNMNSGCKLFGFLPVEPTA : 656
ARF11 : D-----\*-----STTKCQDP-----\*-----NSSNSPKQE : 483
ARF18 : -----\*-----AAKQEP-----\*-----ITPTSMSEQ : 482
Os01g13520 : K-----\*-----GTGSHEDSQLSA-----\*-----FSKVTKEHIAADESPQEI : 586
ARF9 : P-----\*-----TMSHSDPKSEIS-----\*-----KVSEKQEPAEQSPREV : 514
Os01g70270 : TPSS-----\*-----LNQLQPVQTDCCIPEVSVSTA--GATENEKSGQAQSSSKVD : 683
ARF2 : DAAG-----\*-----LTQIASPKVQDLSQSKGSK--STNDHREQRFPQTNNPHPKD : 724
Os11g32110 : TPGAT-----\*-----EWRRPDVEVEKCDSPSKAMKPLDTPQDSVFEK-PSSQASRMS : 699
Os12g29520 : Q-----\*-----DALEEDSDLSQPSHANK-----\*-----SDAFASSEP--SF : 704
Os02g35140 : QFAA-----\*-----SVDAESDLSQPSHANK-----\*-----SDAFASSEP--SF : 539
Os04g36054 : QTVL-----\*-----SVDVDSQISQPSNMGK--SDFAGTSSER--SF : 538
ARF1 : QVVP-----\*-----SNEFDSGQSEPLINQ-----\*-----SDIPSGSDPEKSLRSP : 533
ARF12 : K-----\*-----KFGLSQTLRSPTIE : 502
ARF22 : K-----\*-----KFGSQTLRSPTIE : 500
ARF20 : K-----\*-----KFGSQTLRSPTIE : 486
ARF21 : K-----\*-----KFGSQTLRSPTIE : 502
ARF15 : K-----\*-----KFGSQTLRSPTKI : 507
ARF14 : K-----\*-----KFGSQTLRSPTIE : 501
ARF23 : -----\*----- : -
ARF13 : S-----\*-----KLNQKATTSCLKI : 497
Os02g41800 : TGNSS-----\*-----LNNWTEKG--ASEGSGSVIQNSPTDNTS-SERLQWFREN-S : 586
Os04g43910 : SPN-----\*-----WDAEKAPNTSEGSDSVGTQSGPTKNTTFSWSLPHYFGNNIS : 600
Os06g47150 : SSS-----\*-----DGNANTVMSKNSDVSPPRSNQTGTDMLSCGGVPLCQDN : 605
Os10g33940 : FGV-----\*-----TGNSS--PNGNAHTGNASDSSGSSICIG--FSSQGH : 594
ARF10 : IEA-----\*-----EABE-----\*-----KLVARGLTWNYSLO : 576
ARF16 : IEK-----\*-----TQISS-----\*-----GSSNQGVAGREFSSDEGS--PCSCK : 575
ARF17 : FGS-----\*-----PPSDNLSPNSNTT-----\*----- : 502

```

Os02g06910 : *          1380          *          1400          *          1420          *          1440          *          1460          *          1480
Os06g46410 : QVNV--RPHATFVKVYKSGTGRLLDITRFSSHEHRESEGRGEGLEGLEDPLRSGWIVVDREDDVLLVGGDPWQEFVNSVSCRKLSPQEVQOMGKPGIELFSTSRAR--- : 878
Os12g41950 : SVNP--SQGATFVKVYKSGTGRLLDITRFSSHEHRESEGRGEGLEGLEDPLRSGWIVVDREDDVLLVGGDPWQEFVNSVSCRKLSPQEVQOMGKPGIELFSTSRAR--- : 887
ARF6       : SEN---PQSTFVKVYKSGTGRLLDITRFSSHEHRESEGRGEGLEGLEDPLRSGWIVVDREDDVLLVGGDPWQEFVNSVSCRKLSPQEVQOMGKPGIELFSTSRAR--- : 898
Os04g57610 : NDF---ATRFVKVYKSGTGRLLDITRFSSHEHRESEGRGEGLEGLEDPLRSGWIVVDREDDVLLVGGDPWQEFVNSVSCRKLSPQEVQOMGKPGIELFSTSRAR--- : 814
AR8        : INSS--NQTMMFVKVYKSGTGRLLDITRFSSHEHRESEGRGEGLEGLEDPLRSGWIVVDREDDVLLVGGDPWQEFVNSVSCRKLSPQEVQOMGKPGIELFSTSRAR--- : 802
Os02g04810 : AA-PLQMRRTFVKVYKSGTGRLLDITRFSSHEHRESEGRGEGLEGLEDPLRSGWIVVDREDDVLLVGGDPWQEFVNSVSCRKLSPQEVQOMGKPGIELFSTSRAR--- : 1125
Os06g48950 : PA-AFLKMRRTFVKVYKSGTGRLLDITRFSSHEHRESEGRGEGLEGLEDPLRSGWIVVDREDDVLLVGGDPWQEFVNSVSCRKLSPQEVQOMGKPGIELFSTSRAR--- : 1095
Os08g40900 : AAGPAHQMRRTFVKVYKSGTGRLLDITRFSSHEHRESEGRGEGLEGLEDPLRSGWIVVDREDDVLLVGGDPWQEFVNSVSCRKLSPQEVQOMGKPGIELFSTSRAR--- : 1037
ARF7       : AQ---TQMRRTFVKVYKSGTGRLLDITRFSSHEHRESEGRGEGLEGLEDPLRSGWIVVDREDDVLLVGGDPWQEFVNSVSCRKLSPQEVQOMGKPGIELFSTSRAR--- : 1138
ARF19      : NQ---TQMRRTFVKVYKSGTGRLLDITRFSSHEHRESEGRGEGLEGLEDPLRSGWIVVDREDDVLLVGGDPWQEFVNSVSCRKLSPQEVQOMGKPGIELFSTSRAR--- : 1058
Os06g09660 : NQ---TQMRRTFVKVYKSGTGRLLDITRFSSHEHRESEGRGEGLEGLEDPLRSGWIVVDREDDVLLVGGDPWQEFVNSVSCRKLSPQEVQOMGKPGIELFSTSRAR--- : 1040
Os04g56850 : ---MKPVRTYTKVQKTSVGRSDIDVTFGRNHEHRSACAGGEGLEGLEDPLRSGWIVVDREDDVLLVGGDPWQEFVNSVSCRKLSPQEVQOMGKPGIELFSTSRAR--- : 949
ARF5       : WQKIATPRVRYTKVQKTSVGRSDIDVTFGRNHEHRSACAGGEGLEGLEDPLRSGWIVVDREDDVLLVGGDPWQEFVNSVSCRKLSPQEVQOMGKPGIELFSTSRAR--- : 894
Os01g48060 : LWPHLISGVLDECTREKLSHPSVSGAEHSENNKNTNGCKGIGIS-----LTEKAQAQEVDCGNASYHRSQSLKQPMPKSLGSSCATVHEQRVVGRR : 711
Os05g48870 : LQPYPTSGEVIDQVTVKSHSPGRHGKDGPDNKAAGTNSCKGIGIS-----LTEKVPAREELDDGDANYSS--LQSLK-VQPKSLGNSCATVSVL----- : 695
Os01g54990 : ---QKLLSETSWQDFIKGASTPGNATKFGNGGREDRTSCKGIGIS-----LTEKIIPTKDGEKEVSYETDCQNPFR--MLDLFGYNSCTPGALHALCAA : 727
Os05g43920 : GTQRQTFESITSNQFALAKRIPAPFSGAESGLPKRDAGRSSCRGIGIS-----LTGNMLGEGEGLLDDGAEIAGCENPP--VLEFLGHSHSTPGALHALCAA : 694
ARF3       : -----PNGRFDHHC-----GSGCRKIGFP-----LTBETTAVASATAVPCVEGNSKASAVQSNHHHSQGRDIYAMRMLLD : 605
ARF4       : SKQFSSTRTCTKVQMGVTLGAVDLSVINGDQILEEKEDLKGQLOTRNQ--WEIATBDSDBKMLVGGDPWPEFCNMVKKFLYKKEEVKKNKSKRSLSS----- : 598
ARF11      : KQQT--STRSRKIVQMGVTLGAVDLSVINGDQILEEKEDLKGQLOTRNQ--WEIATBDSDBKMLVGGDPWPEFCNMVKKFLYKKEEVKKNKSKRSLSS----- : 590
ARF18      : KQKQ--TSRSRTKIVQMGVTLGAVDLSVINGDQILEEKEDLKGQLOTRNQ--WEIATBDSDBKMLVGGDPWPEFCNMVKKFLYKKEEVKKNKSKRSLSS----- : 592
Os01g13520 : QSKQNYTARTKIVQMGVTLGAVDLSVINGDQILEEKEDLKGQLOTRNQ--WEIATBDSDBKMLVGGDPWPEFCNMVKKFLYKKEEVKKNKSKRSLSS----- : 589
ARF9       : SKQFSSTRTCTKVQMGVTLGAVDLSVINGDQILEEKEDLKGQLOTRNQ--WEIATBDSDBKMLVGGDPWPEFCNMVKKFLYKKEEVKKNKSKRSLSS----- : 626
Os01g70270 : SKTQVASTRSTCTKVQMGVTLGAVDLSVINGDQILEEKEDLKGQLOTRNQ--WEIATBDSDBKMLVGGDPWPEFCNMVKKFLYKKEEVKKNKSKRSLSS----- : 790
ARF2       : AQTKNSTRSTCTKVQMGVTLGAVDLSVINGDQILEEKEDLKGQLOTRNQ--WEIATBDSDBKMLVGGDPWPEFCNMVKKFLYKKEEVKKNKSKRSLSS----- : 837
Os11g32110 : SKQFSSTRTCTKVQMGVTLGAVDLSVINGDQILEEKEDLKGQLOTRNQ--WEIATBDSDBKMLVGGDPWPEFCNMVKKFLYKKEEVKKNKSKRSLSS----- : 812
Os12g29520 : SKQFSSTRTCTKVQMGVTLGAVDLSVINGDQILEEKEDLKGQLOTRNQ--WEIATBDSDBKMLVGGDPWPEFCNMVKKFLYKKEEVKKNKSKRSLSS----- : 817
Os02g35140 : HETQSRQVRSCTKIVQMGVTLGAVDLSVINGDQILEEKEDLKGQLOTRNQ--WEIATBDSDBKMLVGGDPWPEFCNMVKKFLYKKEEVKKNKSKRSLSS----- : 652
Os04g36054 : LESQSRQVRSCTKIVQMGVTLGAVDLSVINGDQILEEKEDLKGQLOTRNQ--WEIATBDSDBKMLVGGDPWPEFCNMVKKFLYKKEEVKKNKSKRSLSS----- : 651
ARF1       : QSKQFSSTRTCTKVQMGVTLGAVDLSVINGDQILEEKEDLKGQLOTRNQ--WEIATBDSDBKMLVGGDPWPEFCNMVKKFLYKKEEVKKNKSKRSLSS----- : 645
ARF12      : QNKQFSSTRTCTKVQMGVTLGAVDLSVINGDQILEEKEDLKGQLOTRNQ--WEIATBDSDBKMLVGGDPWPEFCNMVKKFLYKKEEVKKNKSKRSLSS----- : 593
ARF22      : QSKQFSSTRTCTKVQMGVTLGAVDLSVINGDQILEEKEDLKGQLOTRNQ--WEIATBDSDBKMLVGGDPWPEFCNMVKKFLYKKEEVKKNKSKRSLSS----- : 598
ARF20      : QSKQFSSTRTCTKVQMGVTLGAVDLSVINGDQILEEKEDLKGQLOTRNQ--WEIATBDSDBKMLVGGDPWPEFCNMVKKFLYKKEEVKKNKSKRSLSS----- : 590
ARF21      : QSKQFSSTRTCTKVQMGVTLGAVDLSVINGDQILEEKEDLKGQLOTRNQ--WEIATBDSDBKMLVGGDPWPEFCNMVKKFLYKKEEVKKNKSKRSLSS----- : 606
ARF15      : QSKQFSSTRTCTKVQMGVTLGAVDLSVINGDQILEEKEDLKGQLOTRNQ--WEIATBDSDBKMLVGGDPWPEFCNMVKKFLYKKEEVKKNKSKRSLSS----- : 598
ARF14      : QSKQFSSTRTCTKVQMGVTLGAVDLSVINGDQILEEKEDLKGQLOTRNQ--WEIATBDSDBKMLVGGDPWPEFCNMVKKFLYKKEEVKKNKSKRSLSS----- : 605
ARF23      : -----LTKPNL----- : -
ARF13      : KS-----LTKPNL----- : 505
Os02g41800 : TVSELGLEPGQCKVIESDVTGRLDLSLASSSEYGRSEMHCID-SAELRSR--VLRDAGATGEVRAHAEPPFSEIKLARRTITLTDAGSDNIGS----- : 681
Os04g43910 : RASEYELNPGQCKVIESDVTGRLDLSLASSSEYGRSEMHCID-SAELRSR--VLRDAGATGEVRAHAEPPFSEIKLARRTITLTDAGSDNIGS----- : 695
Os06g47150 : KVLVDGLGTGCKVFMQSEDVGRDLDLSVINGDQILEEKEDLKGQLOTRNQ--WEIATBDSDBKMLVGGDPWPEFCNMVKKFLYKKEEVKKNKSKRSLSS----- : 700
Os10g33940 : EASLDLGAAGCKVFMQSEDVGRDLDLSVINGDQILEEKEDLKGQLOTRNQ--WEIATBDSDBKMLVGGDPWPEFCNMVKKFLYKKEEVKKNKSKRSLSS----- : 698
ARF10      : ---GLETGCKVFMQSEDVGRDLDLSVINGDQILEEKEDLKGQLOTRNQ--WEIATBDSDBKMLVGGDPWPEFCNMVKKFLYKKEEVKKNKSKRSLSS----- : 681
ARF16      : VHDASGLGTGCKVFMQSEDVGRDLDLSVINGDQILEEKEDLKGQLOTRNQ--WEIATBDSDBKMLVGGDPWPEFCNMVKKFLYKKEEVKKNKSKRSLSS----- : 670
ARF17      : ---NLSSG---NDLVNRRGFLSKVNSTGIFGKIITVEHSESQPAESG--ICEEDGSKESSDNETQLSLSHAPPSVPRKHSNAGSSSQG----- : 585
          gr d          f          g p f
          *          1500          *          1520          *
Os02g06910 : --RLG--NSCDNYMSRQESRSLSTGIASVG-SVEF----- : 908
Os06g46410 : --RLG--SSCDYYSRQESRSLSTGIASVG-SVEF----- : 917
Os12g41950 : --RMQSNACDDYSASHNQNIAGNIASVA-PLDY----- : 899
ARF6       : VDKLFSNGCDDFGNRS DPRNLGNIGASVGGSFNY----- : 933
Os04g57610 : -----NDPRTYLS----- : 821
ARF8       : -----LFPQNPTHL----- : 811
Os02g04810 : -----NQACSSSDGVNWRPRCDQNP-----GNPSIGPYDQFE-- : 1158
Os06g48950 : -----NQACSSSDGGNAWRARCDQNSEALKISMMSKSKVEDVRYWNTA : 1138
Os08g40900 : -----NQACSSSDGGHPWRITGD----- : 1055
ARF7       : -----NQACSSSDGGNAWRGHYDDN-SATSFNR----- : 1165
ARF19      : -----NQACSETDSGNAWKVHYEDTSAASFNRR----- : 1086
Os06g09660 : -----TQACASDDANAWRG----- : 1055
Os04g56850 : -----DCIQAA----- : 955
ARF5       : -----NDLKTSVS----- : 902
Os01g48060 : VVDISAVNTMI----- : 722
Os05g48870 : ----- : -
Os01g54990 : P-LGI----- : 731
Os05g43920 : APLGM----- : 699
ARF3       : IAL----- : 608
ARF4       : ASKSSSVSQPDSSTITRV----- : 788
ARF11      : NLESQRT-----VHV----- : 601
ARF18      : NESFENRS-----RG----- : 602
Os01g13520 : NPEQDQKT-----GF----- : 699
ARF9       : LTTSTKTD-----NHSN----- : 638
Os01g70270 : ---DSEN--EKG--HLMPNKSNDN----- : 808
ARF2       : EGSDAKDA--KSA--SNPSSLSAGNS----- : 859
Os11g32110 : MERGSVGR--EMRGCLSTSSLSNENC----- : 836
Os12g29520 : VERGLVGE--GLQGSLTSPSLNENC----- : 841
Os02g35140 : PNKQSFSDMPSHSDTAPVTDKDC----- : 678
Os04g36054 : SMDSSHES----VLDNDHASVTRNDKDC----- : 673
ARF1       : ADAEENGN----TEGRSSSMAGSR----- : 665
ARF12      : ----- : -
ARF22      : ----- : -
ARF20      : ----- : -
ARF21      : ----- : -
ARF15      : ----- : -
ARF14      : ----- : -
ARF23      : ----- : -
ARF13      : ----- : -
Os02g41800 : ----- : -
Os04g43910 : ----- : -
Os06g47150 : ----- : -
Os10g33940 : ----- : -
ARF10      : ASTKTGPLSIFA----- : 693
ARF16      : ----- : -
ARF17      : ----- : -

```

Supplemental Figure 5. Multiple alignments of the ARF Protein Sequences by CLUSTAL X.
